# Supplementary material for: Classification of Vascular Plants in Vietnam According to Modern Classification Systems
Source: MDPI journal article supplement (doi:10.3390/plants12040967), 2023-02-20
Supplement: s1 [file s1]

**Table S1.** Comparison of classifications of lycophyte and fern families of Vietnam in IFV and CPSV. (Scientific names in boldface were newly circumscribed for Vietnam).

| IFV<br>(1999)         |                                                                                                                                                                                                                                  | CPSV<br>(2001)       |                                                                                                                                                                                                                                                   | Phan<br>(2010)        |                                                                               |
|-----------------------|----------------------------------------------------------------------------------------------------------------------------------------------------------------------------------------------------------------------------------|----------------------|---------------------------------------------------------------------------------------------------------------------------------------------------------------------------------------------------------------------------------------------------|-----------------------|-------------------------------------------------------------------------------|
| Families              | Genera                                                                                                                                                                                                                           | Families             | Genera                                                                                                                                                                                                                                            | Families              | Genera                                                                        |
| <b>Psilotophyta</b>   |                                                                                                                                                                                                                                  |                      |                                                                                                                                                                                                                                                   | <b>Psilotopsida</b>   |                                                                               |
|                       |                                                                                                                                                                                                                                  |                      |                                                                                                                                                                                                                                                   | 1. Ophioglossaceae    | <i>Botrychium</i><br><i>Ophioglossum</i>                                      |
| 1. Psilotaceae        | <i>Psilotum</i>                                                                                                                                                                                                                  | 1. Psilotaceae       | <i>Psilotum</i>                                                                                                                                                                                                                                   | 2. Psilotaceae        | <i>Psilotum</i>                                                               |
| <b>Lycopodiophyta</b> |                                                                                                                                                                                                                                  |                      |                                                                                                                                                                                                                                                   |                       |                                                                               |
| 2. Lycopodiaceae      | <i>Huperzia</i><br><i>Lycopodium</i>                                                                                                                                                                                             | 1. Lycopodiaceae     | <i>Huperzia</i><br><i>Lycopodiella</i><br><i>Lycopodium</i>                                                                                                                                                                                       |                       |                                                                               |
| 3. Isoetaceae         | <i>Isoetes</i>                                                                                                                                                                                                                   | 2. Isoetaceae        | <i>Isoetes</i>                                                                                                                                                                                                                                    |                       |                                                                               |
| 4. Selaginellaceae    | <i>Selaginella</i>                                                                                                                                                                                                               | 3. Selaginellaceae   | <i>Selaginella</i>                                                                                                                                                                                                                                |                       |                                                                               |
| <b>Equisetophyta</b>  |                                                                                                                                                                                                                                  |                      |                                                                                                                                                                                                                                                   | <b>Equisetopsida</b>  |                                                                               |
| 5. Equisetaceae       | <i>Equisetum</i>                                                                                                                                                                                                                 | 1. Equisetaceae      | <i>Equisetum</i>                                                                                                                                                                                                                                  | 3. Equisetaceae       | <i>Equisetum</i>                                                              |
|                       |                                                                                                                                                                                                                                  |                      |                                                                                                                                                                                                                                                   | <b>Marattiopsida</b>  |                                                                               |
|                       |                                                                                                                                                                                                                                  |                      |                                                                                                                                                                                                                                                   | 4. Marattiaceae       | <i>Angiopteris</i><br><i>Christensenia</i><br><i>Marattia</i>                 |
| <b>Polypodiophyta</b> |                                                                                                                                                                                                                                  |                      |                                                                                                                                                                                                                                                   | <b>Polypodiopsida</b> |                                                                               |
| 6. Adiantaceae        | <i>Adiantum</i><br><i>Cheilanthes</i><br><i>Coniogramme</i><br><i>Dryopteris</i><br><i>Hemionitis</i><br><br><i>Onychium</i><br><i>Pellaea</i><br><i>Pityrogramma</i><br><i>Syngamma</i><br><i>Taenitis</i><br><i>Notholaena</i> | 1. Adiantaceae       | <i>Adiantum</i><br><i>Cheilanthes</i><br><i>Coniogramme</i><br><i>Dryopteris</i><br><i>Hemionitis</i><br><i>Mildella</i><br><i>Monachosorum</i><br><i>Onychium</i><br><i>Pellaea</i><br><i>Pityrogramma</i><br><i>Syngamma</i><br><i>Taenitis</i> |                       |                                                                               |
| 7. Aspleniaceae       | <i>Asplenium</i><br><br><i>Athyrium</i><br><i>Cystopteris</i><br><i>Diplazium</i>                                                                                                                                                | 2. Aspleniaceae      | <i>Asplenium</i>                                                                                                                                                                                                                                  | 19. Aspleniaceae      | <i>Asplenium</i><br><b><i>Hymenoasplenium</i></b>                             |
| 8. Azollaceae         | <i>Azolla</i>                                                                                                                                                                                                                    | 3. Azollaceae        | <i>Azolla</i>                                                                                                                                                                                                                                     |                       |                                                                               |
| 9. Blechnaceae        | <i>Blechnum</i><br><i>Brainea</i><br><br><i>Woodwardia</i>                                                                                                                                                                       | 4. Blechnaceae       | <i>Blechnum</i><br><i>Brainea</i><br><i>Stenochlaena</i><br><i>Woodwardia</i>                                                                                                                                                                     | 22. Blechnaceae       | <i>Blechnum</i><br><i>Brainea</i><br><i>Stenochlaena</i><br><i>Woodwardia</i> |
| 10. Cheiropleuriaceae | <i>Cheiropleuria</i>                                                                                                                                                                                                             | 5. Cheiropleuriaceae | <i>Cheiropleuria</i>                                                                                                                                                                                                                              |                       |                                                                               |
| 11. Cyathaceae        | <i>Cyathea</i>                                                                                                                                                                                                                   | 6. Cyathaceae        | <i>Cyathea</i>                                                                                                                                                                                                                                    | 15. Cyatheaceae       | <i>Cyathea</i><br><i>Alsophila</i><br><i>Sphaeropteris</i>                    |

| IFV<br>(1999)         |                                                                                                                                                                                                               | CPSV<br>(2001)      |                                                                                                                                                                            | Phan<br>(2010)       |                                                                                                                                                                                                                                                                                                    |
|-----------------------|---------------------------------------------------------------------------------------------------------------------------------------------------------------------------------------------------------------|---------------------|----------------------------------------------------------------------------------------------------------------------------------------------------------------------------|----------------------|----------------------------------------------------------------------------------------------------------------------------------------------------------------------------------------------------------------------------------------------------------------------------------------------------|
| Families              | Genera                                                                                                                                                                                                        | Families            | Genera                                                                                                                                                                     | Families             | Genera                                                                                                                                                                                                                                                                                             |
| 12. Davalliaceae      | <i>Araiostegia</i><br><i>Arthropteris</i><br><i>Davallia</i><br><i>Davallodes</i><br><i>Humata</i><br><i>Gymnogrammitis</i><br><i>Nephrolepis</i><br><i>Leucostegia</i><br><i>Rhumohra</i><br><i>Oleandra</i> | 7. Davalliaceae     | <i>Araiostegia</i><br><br><i>Davallia</i><br><i>Davallodes</i><br><br><i>Gymnogrammitis</i><br><br><i>Leucostegia</i><br><i>Rhumohra</i>                                   | 27. Davalliaceae     | <i>Araiostegia</i><br><br><i>Davallia</i><br><i>Davallodes</i>                                                                                                                                                                                                                                     |
| 13. Dennstaedtiaceae  | <i>Dennstaedtia</i><br><i>Histiopteris</i><br><i>Hypolepis</i><br><i>Microlepia</i><br><i>Monachosorium</i><br><i>Pteridium</i><br><i>Lindsaea</i><br><i>Sphenomeris</i><br><i>Tapeinidium</i>                | 8. Dennstaedtiaceae | <i>Dennstaedtia</i><br><i>Histiopteris</i><br><i>Hypolepis</i><br><i>Microlepia</i><br><br><i>Pteridium</i><br><i>Lindsaea</i><br><i>Sphenomeris</i><br><i>Tapeinidium</i> | 17. Dennstaedtiaceae | <i>Dennstaedtia</i><br><i>Histiopteris</i><br><i>Hypolepis</i><br><i>Microlepia</i><br><i>Monachosorium</i><br><i>Pteridium</i>                                                                                                                                                                    |
| 14. Thyrsopteridaceae | <i>Cibotium</i>                                                                                                                                                                                               | 9. Dicksoniaceae    | <i>Cibotium</i>                                                                                                                                                            | 16. Lindsaeaceae     | <i>Lindsaea</i>                                                                                                                                                                                                                                                                                    |
| 15. Dipteridaceae     | <i>Dipteris</i>                                                                                                                                                                                               | 10. Dipteridaceae   | <i>Dipteris</i>                                                                                                                                                            | 14. Cibotiaceae      | <i>Cibotium</i>                                                                                                                                                                                                                                                                                    |
| 16. Dryopteridaceae   |                                                                                                                                                                                                               | 11. Dryopteridaceae | <i>Acrophorus</i>                                                                                                                                                          | 8. Dipteridaceae     | <i>Cheiropleuria</i><br><i>Dipteris</i>                                                                                                                                                                                                                                                            |
|                       | <i>Arachniodes</i><br><i>Ctenitis</i><br><i>Ctenitopsis</i><br><i>Cyrtomium</i><br><i>Cyrtogonellum</i><br><i>Diacalpe</i><br><i>Didymochlaena</i><br><i>Dryopteris</i>                                       |                     | <i>Arachniodes</i><br><i>Ctenitis</i><br><br><i>Cyrtomium</i><br><br><i>Diacalpe</i><br><i>Didymochlaena</i><br><i>Dryopteris</i>                                          | 23. Dryopteridaceae  | <i>Acrophorus</i><br><br><i>Acrorumohra</i><br><i>Arachniodes</i><br><i>Ctenitis</i><br><br><i>Cyrtomium</i><br><i>Cyrtogonellum</i><br><br><i>Didymochlaena</i><br><i>Dryopteris</i><br><i>Elaphoglossum</i><br><i>Hypodematium</i><br><i>Leucostegia</i><br><i>Lomagramma</i><br><i>Peranema</i> |
|                       | <i>Hemigramma</i><br><i>Quercifilix</i>                                                                                                                                                                       |                     | <i>Polystichopsis</i><br><i>Polystichum</i><br><i>Cyclopeltis</i>                                                                                                          | 24. Lomariopsidaceae | <i>Polystichum</i><br><i>Cyclopeltis</i>                                                                                                                                                                                                                                                           |
|                       | <i>Polystichum</i><br><i>Cyclopeltis</i>                                                                                                                                                                      |                     | <i>Heterogonium</i><br><i>Pleocnemia</i><br><i>Pteridrys</i><br><i>Tectaria</i>                                                                                            | 25. Tectariaceae     | <i>Heterogonium</i><br><i>Pleocnemia</i><br><i>Pteridrys</i><br><i>Tectaria</i>                                                                                                                                                                                                                    |
| 17. Gleicheniaceae    | <i>Dicranopteris</i>                                                                                                                                                                                          | 12. Gleicheniaceae  | <i>Dicranopteris</i>                                                                                                                                                       | 7. Gleicheniaceae    | <i>Dicranopteris</i>                                                                                                                                                                                                                                                                               |

| IFV<br>(1999)             |                                                                                                                                                                                                                            | CPSV<br>(2001)       |                                                                                                                                                   | Phan<br>(2010)       |                                                                                                                                                                |
|---------------------------|----------------------------------------------------------------------------------------------------------------------------------------------------------------------------------------------------------------------------|----------------------|---------------------------------------------------------------------------------------------------------------------------------------------------|----------------------|----------------------------------------------------------------------------------------------------------------------------------------------------------------|
| Families                  | Genera                                                                                                                                                                                                                     | Families             | Genera                                                                                                                                            | Families             | Genera                                                                                                                                                         |
|                           | <i>Diplopterygium</i><br><i>Gleichenia</i>                                                                                                                                                                                 |                      | <i>Diplopterygium</i><br><i>Gleichenia</i>                                                                                                        |                      | <i>Diplopterygium</i><br><i>Gleichenia</i>                                                                                                                     |
| 18. Gram-<br>mitidaceae   | <i>Acrosorus</i><br><i>Calymmodon</i><br><i>Ctenopteris</i><br><i>Grammitis</i><br><i>Prosaptia</i><br><i>Scleroglossum</i><br><i>Xiphopteris</i><br><i>Loxogramme</i>                                                     | 13. Grammitidaceae   | <i>Acrosorus</i><br><i>Calymmodon</i><br><i>Ctenopteris</i><br><i>Grammitis</i><br><i>Prosaptia</i><br><i>Scleroglossum</i><br><i>Xiphopteris</i> |                      |                                                                                                                                                                |
| 19. Hymenophyl-<br>laceae | <i>Cephalomanes</i><br><i>Crepidomanes</i><br><i>Gnocormus</i><br><i>Hymenophyllum</i><br><i>Mecodium</i><br><i>Meringium</i><br><i>Microgonium</i><br><i>Sphaerocionium</i><br><i>Trichomanes</i><br><i>Vandenboschia</i> | 14. Hymenophyllaceae | <i>Cephalomanes</i><br><i>Crepidomanes</i><br><i>Hymenophyllum</i><br><i>Sphaerocionium</i><br><i>Trichomanes</i>                                 | 6. Hymenophyllaceae  | <i>Cephalomanes</i><br><i>Abrodictyum</i><br><i>Crepidomanes</i><br><i>Didymoglossum</i><br><i>Hymenophyllum</i><br><i>Trichomanes</i><br><i>Vandenboschia</i> |
| 20. Lomariopsida-<br>ceae | <i>Bolbitis</i><br><i>Egenolfia</i><br><i>Elaphoglossum</i><br><i>Lomariopsis</i>                                                                                                                                          | 15. Lomariopsidaceae | <i>Bolbitis</i><br><i>Elaphoglossum</i><br><i>Lomagramma</i><br><i>Teratophyllum</i><br><i>Lomariopsis</i>                                        | 24. Lomariopsidaceae | <i>Lomariopsis</i>                                                                                                                                             |
| 21. Marattiaceae          | <i>Marattia</i>                                                                                                                                                                                                            | 16. Marattiaceae     | <i>Marattia</i>                                                                                                                                   |                      |                                                                                                                                                                |
| 22. Angiopterida-<br>ceae | <i>Angiopteris</i><br><i>Archangiopteris</i>                                                                                                                                                                               |                      | <i>Angiopteris</i>                                                                                                                                |                      |                                                                                                                                                                |
| 23. Marsileaceae          | <i>Marsilea</i>                                                                                                                                                                                                            | 17. Marsileaceae     | <i>Marsilea</i>                                                                                                                                   | 11. Marsileaceae     | <i>Marsilea</i>                                                                                                                                                |
|                           |                                                                                                                                                                                                                            | 18. Oleandraceae     | <i>Arthropteris</i><br><i>Nephrolepis</i><br><i>Oleandra</i>                                                                                      | 25. Tectariaceae     | <i>Arthropteris</i>                                                                                                                                            |
|                           |                                                                                                                                                                                                                            |                      |                                                                                                                                                   | 24. Lomariopsidaceae | <i>Nephrolepis</i>                                                                                                                                             |
|                           |                                                                                                                                                                                                                            |                      |                                                                                                                                                   | 26. Oleandraceae     | <i>Oleandra</i>                                                                                                                                                |
| 24. Ophioglos-<br>saceae  | <i>Botrychium</i><br><i>Helminthostachys</i><br><i>Ophioglossum</i>                                                                                                                                                        | 19. Ophioglossaceae  | <i>Botrychium</i><br><i>Helminthostachys</i><br><i>Ophioglossum</i>                                                                               |                      |                                                                                                                                                                |
| 25. Osmundaceae           | <i>Osmunda</i>                                                                                                                                                                                                             | 20. Osmundaceae      | <i>Osmunda</i>                                                                                                                                    | 5. Osmundaceae       | <i>Osmunda</i>                                                                                                                                                 |
| 26. Parkeriaceae          | <i>Ceratopteris</i>                                                                                                                                                                                                        | 21. Parkeriaceae     | <i>Ceratopteris</i>                                                                                                                               |                      |                                                                                                                                                                |
| 27. Plagiogyriaceae       | <i>Plagiogyria</i>                                                                                                                                                                                                         | 22. Plagiogyriaceae  | <i>Plagiogyria</i>                                                                                                                                | 13. Plagiogyriaceae  | <i>Plagiogyria</i>                                                                                                                                             |
| 28. Polypodiaceae         | <i>Aglaomorpha</i><br><i>Arthromeris</i><br><i>Belvisia</i>                                                                                                                                                                | 23. Polypodiaceae    | <i>Aglaomorpha</i><br><i>Arthromeris</i><br><i>Belvisia</i>                                                                                       | 28. Polypodiaceae    | <i>Aglaomorpha</i><br><i>Arthromeris</i><br><i>Belvisia</i>                                                                                                    |

| IFV<br>(1999)        |                                                                                                                                                                | CPSV<br>(2001)       |                                                                                                           | Phan<br>(2010)        |                                                                                                                                                                                                                                                                                                                                                                                                    |
|----------------------|----------------------------------------------------------------------------------------------------------------------------------------------------------------|----------------------|-----------------------------------------------------------------------------------------------------------|-----------------------|----------------------------------------------------------------------------------------------------------------------------------------------------------------------------------------------------------------------------------------------------------------------------------------------------------------------------------------------------------------------------------------------------|
| Families             | Genera                                                                                                                                                         | Families             | Genera                                                                                                    | Families              | Genera                                                                                                                                                                                                                                                                                                                                                                                             |
|                      | <i>Christiopteris</i><br><i>Colysis</i><br><i>Crypsinus</i><br><i>Drynaria</i><br><i>Goniophlebium</i>                                                         |                      | <i>Christiopteris</i><br><i>Colysis</i><br><i>Crypsinus</i><br><i>Drynaria</i><br><i>Goniophlebium</i>    |                       | <b>Caobangia</b><br><i>Christiopteris</i><br><br><i>Drynaria</i><br><i>Goniophlebium</i><br><i>Gymnogrammitis</i><br><i>Kontumia</i><br><i>Lecanopteris</i><br><i>Lemmaphyllum</i><br><i>Lepisorus</i><br><i>Leptochilus</i><br><i>Loxogramme</i><br><i>Micropolypodium</i><br><i>Microsorium</i>                                                                                                  |
|                      | <i>Lemmaphyllum</i><br><i>Lepisorus</i><br><i>Leptochilus</i>                                                                                                  |                      | <i>Lecanopteris</i><br><i>Lemmaphyllum</i><br><i>Lepisorus</i><br><i>Leptochilus</i><br><i>Loxogramme</i> |                       | <i>Lecanopteris</i><br><i>Lemmaphyllum</i><br><i>Lepisorus</i><br><i>Leptochilus</i><br><i>Loxogramme</i><br><i>Micropolypodium</i><br><i>Microsorium</i>                                                                                                                                                                                                                                          |
|                      | <i>Microsorium</i><br><i>Myrmecopteris</i><br><i>Neocheiropteris</i><br><i>Paragramma</i><br><i>Phymatosorus</i><br><i>Photinopteris</i><br><i>Platynerium</i> |                      | <i>Microsorium</i><br><br><i>Neocheiropteris</i><br><i>Paragramma</i><br><i>Phymatosorus</i>              |                       | <i>Neocheiropteris</i><br><br><br><br><br><br><br><br><b>Platynerium</b><br><b>Polypodioides</b><br><i>Polypodium</i><br><i>Pyrrosia</i><br><i>Selligera</i>                                                                                                                                                                                                                                       |
|                      | <i>Polypodium</i><br><i>Pyrrosia</i><br><i>Selligera</i>                                                                                                       |                      | <i>Polypodium</i><br><i>Pyrrosia</i><br><i>Selligera</i>                                                  |                       | <i>Polypodium</i><br><i>Pyrrosia</i><br><i>Selligera</i>                                                                                                                                                                                                                                                                                                                                           |
| 29. Pteridaceae      | <i>Acrostichum</i>                                                                                                                                             | 24. Pteridaceae      | <i>Acrostichum</i>                                                                                        | 18. Pteridaceae       | <i>Acrostichum</i><br><i>Adiantum</i><br><i>Aleuritopteris</i><br><i>Anogramma</i><br><i>Antrophyum</i><br><i>Ceratopteris</i><br><i>Cheilanthes</i><br><i>Coniogramme</i><br><i>Dryopteris</i><br><i>Hemionitis</i><br><i>Mildella</i><br><i>Notholaena</i><br><i>Onychium</i><br><i>Pellaea</i><br><i>Pityrogramma</i><br><i>Pteris</i><br><i>Syngamma</i><br><i>Taenitis</i><br><i>Vittaria</i> |
|                      | <i>Pteris</i>                                                                                                                                                  |                      | <i>Pteris</i>                                                                                             |                       |                                                                                                                                                                                                                                                                                                                                                                                                    |
| 30. Salviniaceae     | <i>Salvinia</i>                                                                                                                                                | 25. Salviniaceae     | <i>Salvinia</i>                                                                                           | 12. Salviniaceae      | <i>Salvinia</i><br><i>Azolla</i>                                                                                                                                                                                                                                                                                                                                                                   |
| 31. Schizaeaceae     | <i>Schizaea</i><br><i>Lygodium</i>                                                                                                                             | 26. Schizaeaceae     | <i>Schizaea</i><br><i>Lygodium</i>                                                                        | 10. Schizaeaceae      | <i>Schizaea</i>                                                                                                                                                                                                                                                                                                                                                                                    |
|                      |                                                                                                                                                                |                      |                                                                                                           | 9. <b>Lygodiaceae</b> | <i>Lygodium</i>                                                                                                                                                                                                                                                                                                                                                                                    |
| 32. Thelypteridaceae | <i>Ampelopteris</i>                                                                                                                                            | 27. Thelypteridaceae | <i>Ampelopteris</i>                                                                                       | 20. Thelypteridaceae  |                                                                                                                                                                                                                                                                                                                                                                                                    |

| IFV<br>(1999)    |                          | CPSV<br>(2001)   |                           | Phan<br>(2010)  |                          |
|------------------|--------------------------|------------------|---------------------------|-----------------|--------------------------|
| Families         | Genera                   | Families         | Genera                    | Families        | Genera                   |
|                  | <i>Christella</i>        |                  | <i>Amphineuron</i>        |                 |                          |
|                  | <i>Coryphopteris</i>     |                  | <i>Christella</i>         |                 |                          |
|                  | <i>Cyclogramma</i>       |                  | <i>Coryphopteris</i>      |                 |                          |
|                  | <i>Cyclosorus</i>        |                  | <i>Cyclogramma</i>        |                 |                          |
|                  |                          |                  | <i>Cyclosorus</i>         |                 | <i>Cyclosorus</i>        |
|                  |                          |                  | <i>Glaphyopteridopsis</i> |                 |                          |
|                  | <i>Metathelypteris</i>   |                  | <i>Macrothelypteris</i>   |                 | <i>Macrothelypteris</i>  |
|                  |                          |                  | <i>Metathelypteris</i>    |                 |                          |
|                  |                          |                  | <i>Parathelypteris</i>    |                 |                          |
|                  |                          |                  | <i>Phegopteris</i>        |                 | <i>Phegopteris</i>       |
|                  | <i>Pneumatopteris</i>    |                  | <i>Pneumatopteris</i>     |                 |                          |
|                  | <i>Pronephrium</i>       |                  | <i>Pronephrium</i>        |                 |                          |
|                  | <i>Pseudocyclosorus</i>  |                  | <i>Pseudocyclosorus</i>   |                 |                          |
|                  | <i>Pseudophegopteris</i> |                  | <i>Pseudophegopteris</i>  |                 | <i>Pseudophegopteris</i> |
|                  | <i>Sphaerostephanos</i>  |                  | <i>Sphaerostephanos</i>   |                 |                          |
|                  | <i>Stegnogramma</i>      |                  | <i>Stegnogramma</i>       |                 |                          |
|                  | <i>Thelypteris</i>       |                  | <i>Thelypteris</i>        |                 | <i>Thelypteris</i>       |
|                  | <i>Trigonospora</i>      |                  | <i>Trigonospora</i>       |                 |                          |
| 33. Vittariaceae | <i>Antrophyum</i>        | 28. Vittariaceae | <i>Antrophyum</i>         |                 |                          |
|                  | <i>Vittaria</i>          |                  | <i>Vittaria</i>           |                 |                          |
|                  |                          | 29. Woodsiaceae  | <i>Athyrium</i>           | 21. Woodsiaceae | <i>Athyrium</i>          |
|                  |                          |                  |                           |                 | <i>Acystopteris</i>      |
|                  |                          |                  | <i>Cornopteris</i>        |                 | <i>Cornopteris</i>       |
|                  |                          |                  | <i>Cystopteris</i>        |                 |                          |
|                  |                          |                  | <i>Lunathyrium</i>        |                 | <i>Deparia</i>           |
|                  |                          |                  | <i>Diplaziopsis</i>       |                 | <i>Diplaziopsis</i>      |
|                  |                          |                  | <i>Diplazium</i>          |                 | <i>Diplazium</i>         |
|                  |                          |                  | <i>Hypodematum</i>        |                 |                          |
|                  |                          |                  |                           |                 | <i>Rhachidosorus</i>     |

**Table S2.** Comparison of classifications of gymnosperm families of Vietnam in IFV and CPSV. (Generic names in boldface were newly recorded for Vietnam).

| IFV (1999)         |                      | CPSV (2001)        |                    | Nguyen and Thomas (2005) |                                           |
|--------------------|----------------------|--------------------|--------------------|--------------------------|-------------------------------------------|
| Families           | Genera               | Families           | Genera             | Families                 | Genera                                    |
| 1. Cycadaceae      | <i>Cycas</i>         | 4. Cycadaceae      | as IFV             | not recognized           | not recognized                            |
| 2. Gnetaceae       | <i>Gnetum</i>        | 5. Gnetaceae       | as IFV             | not recognized           | not recognized                            |
| 3. Ginkgoaceae     | <i>Ginkgo</i>        | not recognized     | not recognized     | not recognized           | not recognized                            |
| 4. Pinaceae        | <i>Abies</i>         | 6. Pinaceae        | as IFV             | 3. Pinaceae              | as IFV                                    |
|                    | <i>Keteleeria</i>    |                    | as IFV             |                          | as IFV                                    |
|                    | <i>Pinus</i>         |                    | as IFV             |                          | as IFV                                    |
|                    | not recognized       |                    | not recognized     |                          | <b><i>Pseudotsuga</i></b>                 |
|                    | <i>Tsuga</i>         |                    | as IFV             |                          | as IFV                                    |
|                    | <i>Araucaria</i>     | 1. Araucariaceae   | <i>Araucaria</i>   | not recognized           |                                           |
| 5. Taxodiaceae     | <i>Cunninghamia</i>  | 9. Taxodiaceae     | as IFV             |                          | <i>Cunninghamia</i><br>(in Cupressaceae)  |
|                    | <i>Glyptostrobus</i> |                    | as IFV             | not recognized           | <i>Glyptostrobus</i><br>(in Cupressaceae) |
|                    | <i>Taxodium</i>      |                    | as IFV             |                          | not recognized                            |
|                    | <i>Cryptomeria</i>   |                    | not recognized     |                          | not recognized                            |
| 6. Cupressaceae    | <i>Calocedrus</i>    | 3. Cupressaceae    | as IFV             | 2. Cupressaceae          | as IFV                                    |
|                    | <i>Chamaecyparis</i> |                    | not recognized     |                          | not recognized                            |
|                    | <i>Cupressus</i>     |                    | as IFV             |                          | as IFV                                    |
|                    | <i>Fokienia</i>      |                    | as IFV             |                          | as IFV                                    |
|                    | <i>Sabina</i>        |                    | not recognized     |                          | not recognized                            |
|                    | not recognized       |                    | <i>Juniperus</i>   |                          | not recognized                            |
|                    | <i>Thuja</i>         |                    | as IFV             |                          | not recognized                            |
|                    | not recognized       |                    | not recognized     |                          | <b><i>Taiwania</i></b>                    |
|                    | not recognized       |                    | not recognized     |                          | <b><i>Xanthocyparis</i></b>               |
| 7. Podocarpaceae   | not recognized       | 7. Podocarpaceae   | <i>Dacrycarpus</i> | 4. Podocarpaceae         | as CPSV                                   |
|                    | <i>Dacrydium</i>     |                    | as IFV             |                          | as IFV                                    |
|                    | <i>Nageia</i>        |                    | as IFV             |                          | as IFV                                    |
|                    | <i>Decussocarpus</i> |                    | not recognized     |                          | not recognized                            |
|                    | <i>Podocarpus</i>    |                    | as IFV             |                          | as IFV                                    |
| 8. Taxaceae        | <i>Taxus</i>         | 8. Taxaceae        | as IFV             | 6. Taxaceae              | as IFV                                    |
| 9. Cephalotaxaceae | <i>Cephalotaxus</i>  | 2. Cephalotaxaceae | as IFV             | 1. Cephalotaxaceae       | as IFV                                    |
| 10. Amentotaxaceae | <i>Amentotaxus</i>   | 9. Taxaceae        | as IFV             | 5. Taxaceae              | as IFV                                    |

**Table S3.** Comparison of classifications of angiosperm families of Vietnam in IFV and CPSV. (IFV families in boldface were newly circumscribed in CPSV).

| IFV<br>(1999–2003)    | CPSV<br>(2001–2005)   |
|-----------------------|-----------------------|
|                       | <b>MAGNOLIOPSIDA</b>  |
| 1. Magnoliaceae       | 1. Magnoliaceae       |
| 2. Annonaceae         | 2. Annonaceae         |
| 3. Myristicaceae      | 3. Myristicaceae      |
| 4. Chloranthaceae     | 6. Chloranthaceae     |
| 5. Saururaceae        | 9. Saururaceae        |
| 6. Piperaceae         | 10. Piperaceae        |
| 7. Aristolochiaceae   | 11. Aristolochiaceae  |
| 8. Illiciaceae        | 17. Illiciaceae       |
| 9. Schisandraceae     | 18. Schisandraceae    |
| 10. Nelumbonaceae     | 19. Nelumbonaceae     |
| 11. Nymphaeaceae      | 14. Nymphaeaceae      |
| 12. Barclayaceae      | 15. Barclayaceae      |
| 13. Cabombaceae       | 13. Cabombaceae       |
| 14. Ceratophyllaceae  | 16. Ceratophyllaceae  |
| 15. Ranunculaceae     | 23. Ranunculaceae     |
| 16. Berberidaceae     | 24. Berberidaceae     |
| 17. Sargentodoxaceae  | 21. Sargentodoxaceae  |
| 18. Lardizabalaceae   | 20. Lardizabalaceae   |
| 19. Menispermaceae    | 22. Menispermaceae    |
| 20. Papaveraceae      | 25. Papaveraceae      |
| 21. Fumariaceae       | 26. Fumariaceae       |
| 22. Lauraceae         | 8. Lauraceae          |
| 23. Monimiaceae       | 4. Monimiaceae        |
| 24. Hernandiaceae     | 5. Hernandiaceae      |
| 25. Dilleniaceae      | 54. Dilleniaceae      |
| 26. Actinidiaceae     | 81. Actinidiaceae     |
| 27. Paeoniaceae       | 55. Paeoniaceae       |
| 28. Ochnaceae         | 56. Ochnaceae         |
| 29. Theaceae          | 59. Theaceae          |
| 30. Dipterocarpaceae  | 57. Dipterocarpaceae  |
| 31. Ancistrocladaceae | 58. Ancistrocladaceae |
| 32. Stachyuraceae     | 66. Stachyuraceae     |
| 33. Pentaphragmaceae  | 60. Pentaphragmaceae  |
| 34. Elatinaceae       | 64. Elatinaceae       |
| 35. Guttiferaceae     | 62. Clusiaceae        |
| 36. Elaeocarpaceae    | 93. Elaeocarpaceae    |
| 37. Tiliaceae         | 94. Tiliaceae         |
| 38. Sterculiaceae     | 95. Sterculiaceae     |
| 39. Bombacaceae       | 96. Bombacaceae       |
| 40. Malvaceae         | 97. Malvaceae         |
| 41. Nepenthaceae      | 118. Nepenthaceae     |
| 42. Droseraceae       | 117. Droseraceae      |
| 43. Flacourtiaceae    | 65. Flacourtiaceae    |
| 44. Bixaceae          | 68. Bixaceae          |
| 45. Cochlospermaceae  | 69. Cochlospermaceae  |
| 46. Violaceae         | 67. Violaceae         |

47. Tamaricaceae  
48. Turneraceae  
49. Passifloraceae  
50. Caricaceae  
51. Cucurbitaceae  
52. Datiscaeeae  
53. Begoniaceae  
54. Capparaceae  
55. Brassicaceae  
56. Moringaceae  
57. Clethraceae  
58. Epacridaceae  
59. Ericaceae  
60. Sapotaceae  
61. Ebenaceae  
62. Styracaceae  
63. Symplocaceae  
64. Myrsinaceae  
65. Primulaceae  
66. Phytolaccaceae  
67. Nyctaginaceae  
68. Aizoaceae  
69. Cactaceae  
70. Chenopodiaceae  
71. Amaranthaceae  
72. Portulacaceae  
73. Basellaceae  
74. Caryophyllaceae  
75. Polygonaceae  
76. Plumbaginaceae  
77. Connaraceae  
78. Pittosporaceae  
79. Anisophylleaceae  
80. Crassulaceae  
81. Rosaceae  
82. Suriannaceae  
83. Saxifragaceae  
84. Fabaceae  
85. Elaeagnaceae  
86. Proteaceae  
87. Podostemaceae  
88. Tritischaceae  
89. Haloragaceae  
90. Lecythidaceae  
91. Sonneratiaceae  
92. Lythraceae  
93. Crypteroniaceae  
94. Thymelaeaceae  
95. Trapaceae  
96. Myrtaceae  
97. Punicaceae

79. Tamaricaceae  
71. Turneraceae  
70. Passifloraceae  
72. Caricaceae  
73. Cucurbitaceae  
74. Datiscaeeae  
75. Begoniaceae  
76. Capparaceae  
78. Brassicaceae  
77. Moringaceae  
82. Clethraceae  
84. Epacridaceae  
83. Ericaceae  
90. Sapotaceae  
89. Ebenaceae  
87. Styracaceae  
88. Symplocaceae  
91. Myrsinaceae  
92. Primulaceae  
41. Phytolaccaceae  
42. Nyctaginaceae  
44. Aizoaceae  
46. Cactaceae  
51. Chenopodiaceae  
50. Amaranthaceae  
47. Portulacaceae  
48. Basellaceae  
49. Caryophyllaceae  
52. Polygonaceae  
53. Plumbaginaceae  
116. Connaraceae  
107. Pittosporaceae  
124. Anisophylleaceae  
109. Crassulaceae  
111. Rosaceae  
not recognized  
110. Saxifragaceae  
115. Fabaceae  
182. Elaeagnaceae  
183. Proteaceae  
119. Podostemaceae  
not recognized  
131. Haloragaceae  
130. Lecythidaceae  
121. Sonneratiaceae  
120. Lythraceae  
103. Crypteroniaceae  
102. Thymelaeaceae  
129. Trapaceae  
126. Myrtaceae  
122. Punicaceae



- 
- |                         |                         |
|-------------------------|-------------------------|
| 98. Onagraceae          | 128. Onagraceae         |
| 99. Melastomataceae     | 127. Melastomataceae    |
| 100. Combretaceae       | 125. Combretaceae       |
| 101. Rhizophoraceae     | 123. Rhizophoraceae     |
| 102. Alangiaceae        | 157. Alangiaceae        |
| 103. Nyssaceae          | 154. Nyssaceae          |
| 104. Cornaceae          | 155. Cornaceae          |
| 105. Olacaceae          | 172. Olacaceae          |
| 106. Opiliaceae         | 174. Opiliaceae         |
| 107. Santalaceae        | 177. Santalaceae        |
| 108. Loranthaceae       | 179. Loranthaceae       |
| 109. Balanophoraceae    | 181. Balanophoraceae    |
| 110. Celastraceae       | 166. Celastraceae       |
| 111. Salvadoraceae      | 165. Salvadoraceae      |
| 112. Aquifoliaceae      | 163. Aquifoliaceae      |
| 113. Icacinaceae        | 164. Icacinaceae        |
| 114. Cardiopteridaceae  | 176. Cardiopteridaceae  |
| 115. Dichapetalaceae    | 101. Dichapetalaceae    |
| 116. Pandaceae          | 100A. Pandaceae         |
| 117. Buxaceae           | 98. Buxaceae            |
| 118. Euphorbiaceae      | 100. Euphorbiaceae      |
| 119. Oxalidaceae        | 148. Oxalidaceae        |
| 120. Geraniaceae        | 149. Geraniaceae        |
| 121. Tropaealaceae      | 150. Tropaealaceae      |
| 122. Balsaminaceae      | 151. Balsaminaceae      |
| 123. Erythroxylaceae    | 145. Erythroxylaceae    |
| 124. Ixonanthaceae      | 144. Ixonanthaceae      |
| 125. Linaceae           | 143. Linaceae           |
| 126. Bretschneideraceae | 140. Bretschneideraceae |
| 127. Sapindaceae        | 138. Sapindaceae        |
| 128. Staphyleaceae      | 136. Staphyleaceae      |
| 129. Hippocastanaceae   | 139. Hippocastanaceae   |
| 130. Aceraceae          | 137. Aceraceae          |
| 131. Sabiaceae          | 141. Sabiaceae          |
| 132. Malpighiaceae      | 146. Malpighiaceae      |
| 133. Polygalaceae       | 152. Polygalaceae       |
| 134. Xanthophyllaceae   | not recognized          |
| 135. Burseraceae        | 132A. Burseraceae       |
| 136. Anacardiaceae      | 132. Anacardiaceae      |
| 137. Simaroubaceae      | 133. Simaroubaceae      |
| 138. Meliaceae          | 135. Meliaceae          |
| 139. Rutaceae           | 134. Rutaceae           |
| 140. Zygophyllaceae     | 147. Zygophyllaceae     |
| 141. Rhamnaceae         | 168. Rhamnaceae         |
| 142. Leeaceae           | 170. Leeaceae           |
| 143. Vitaceae           | 169. Vitaceae           |
| 144. Apiaceae           | 162. Apiaceae           |
| 145. Araliaceae         | 161. Araliaceae         |
| 146. Aralidaceae        | 161A. Aralidaceae       |
| 147. Platanaceae        | 29. Platanaceae         |
| 148. Eucomiaceae        | 30. Eucomiaceae         |

- |                       |                          |
|-----------------------|--------------------------|
| 149. Hamamelidaceae   | 27. Hamamelidaceae       |
| 150. Daphniphyllaceae | 99. Daphniphyllaceae     |
| 151. Ulmaceae         | 31. Ulmaceae             |
| 152. Cannabaceae      | 33. Cannabaceae          |
| 153. Salicaceae       | 80. Salicaceae           |
| 154. Moraceae         | 32. Moraceae             |
| 155. Urticaceae       | 34. Urticaceae           |
| 156. Rhoipteleaceae   | 39. Rhoipteleaceae       |
| 157. Juglandaceae     | 40. Juglandaceae         |
| 158. Myricaceae       | 38. Myricaceae           |
| 159. Fagaceae         | 36. Fagaceae             |
| 160. Betulaceae       | 37. Betulaceae           |
| 161. Casuarinaceae    | 35. Casuarinaceae        |
| 162. Loganiaceae      | 187. Loganiaceae         |
| 163. Gentianaceae     | 191. Gentianaceae        |
| 164. Apocynaceae      | 189. Apocynaceae         |
| 165. Asclepiadaceae   | 190. Asclepiadaceae      |
| 166. Solanaceae       | 199. Solanaceae          |
| 167. Convolvulaceae   | 195. Convolvulaceae      |
| 168. Cuscutaceae      | 196. Cuscutaceae         |
| 169. Menyanthaceae    | 192. Menyanthaceae       |
| 170. Polemoniaceae    | 194. Polemoniaceae       |
| 171. Hydrophyllaceae  | 197. Hydrophyllaceae     |
| 172. Boraginaceae     | 198. Boraginaceae        |
| 173. Verbenaceae      | 211. Verbenaceae         |
| 174. Lamiaceae        | 212. Lamiaceae           |
| 175. Callitrichiaceae | 213. Callitrichiaceae    |
| 176. Plantaginaceae   | 210. Plantaginaceae      |
| 177. Buddlejaceae     | 200. Buddlejaceae        |
| 178. Oleaceae         | 171. Oleaceae            |
| 179. Scrophulariaceae | 201. Scrophulariaceae    |
| 180. Myoporaceae      | 208. Myoporaceae         |
| 181. Gesneriaceae     | 205. Gesneriaceae        |
| 182. Acanthaceae      | 209. Acanthaceae         |
| 183. Pedaliaceae      | 203. Pedaliaceae         |
| 184. Bignoniaceae     | 202. Bignoniaceae        |
| 185. Lentibulariaceae | 207. Lentibulariaceae    |
| 186. Pentaphragmaceae | not recognized           |
| 187. Campanulaceae    | 214. Campanulaceae       |
| 188. Stylidiaceae     | 217. Stylidiaceae        |
| 189. Goodeniaceae     | 218. Goodeniaceae        |
| 190. Rubiaceae        | 193. Rubiaceae           |
| 191. Carlemanniaceae  | not recognized           |
| 192. Caprifoliaceae   | 184. Caprifoliaceae      |
| 193. Valerianaceae    | 185. Valerianaceae       |
| 194. Dipsacaceae      | 186. Dipsacaceae         |
| 195. Asteraceae       | 219. Asteraceae          |
| not recognized        | <b>7. Calycanthaceae</b> |
| not recognized        | 12. Rafflesiaceae        |
| not recognized        | <b>28. Altingiaceae</b>  |
| not recognized        | <b>43. Molluginaceae</b> |



|                     |                                 |
|---------------------|---------------------------------|
| 214. Typhaceae      | 265. Typhaceae                  |
| 215. Sparganiaceae  | 264. Sparganiaceae              |
| 216. Arecaceae      | 260. Arecaceae                  |
| 217. Bromeliaceae   | 251. Bromeliaceae               |
| 218. Musaceae       | 241. Musaceae                   |
| 219. Strelitziaceae | 240. Strelitziaceae             |
| 220. Heliconiaceae  | 242. Heliconiaceae              |
| 221. Lowiaceae      | 243. Lowiaceae                  |
| 222. Zingiberaceae  | 245. Zingiberaceae              |
| 223. Cannaceae      | 246. Cannaceae                  |
| 224. Marantaceae    | 247. Marantaceae                |
| 225. Philydraceae   | 237. Philydraceae               |
| 226. Pontederiaceae | 236. Pontederiaceae             |
| 227. Hemodoraceae   | not recognized                  |
| 228. Liliaceae      | 229. Liliaceae                  |
| 229. Smilaceae      | 232. Smilaceae                  |
| 230. Amaryllidaceae | 229.3. Amaryllidaceae           |
| 231. Iridaceae      | 238. Iridaceae                  |
| 232. Cyperaceae     | 250. Cyperaceae                 |
| 233. Poaceae        | 259. Poaceae                    |
| 234. Agavaceae      | 229.1. Agavaceae                |
| 235. Hanguanaceae   | 258. Hanguanaceae               |
| 236. Taccaceae      | 235. Taccaceae                  |
| 237. Stemonaceae    | 233. Stemonaceae                |
| 238. Dioscoreaceae  | 234. Dioscoreaceae              |
| 239. Burmanniaceae  | 239. Burmanniaceae              |
| 240. Thismiaceae    | not recognized                  |
| 241. Orchidaceae    | 248. Orchidaceae                |
| not recognized      | <b>225. Ruppiaceae</b>          |
| not recognized      | <b>229.2. Alliaceae</b>         |
| not recognized      | <b>229.4. Asphodelaceae</b>     |
| not recognized      | <b>229.5. Asteliaceae</b>       |
| not recognized      | <b>229.6. Convallariaceae</b>   |
| not recognized      | <b>229.7. Dracaenaceae</b>      |
| not recognized      | <b>229.8. Hemerocallidaceae</b> |
| not recognized      | <b>229.9. Hyacinthaceae</b>     |
| not recognized      | <b>229.10. Liliaceae s.s</b>    |
| not recognized      | <b>229.11. Melanthiaceae</b>    |
| not recognized      | <b>229.12. Nolinaceae</b>       |
| not recognized      | <b>229.13. Phormiaceae</b>      |
| not recognized      | <b>229.14. Trilliaceae</b>      |
| not recognized      | <b>230. Hypoxidaceae</b>        |
| not recognized      | <b>231. Asparagaceae</b>        |
| not recognized      | <b>244. Costaceae</b>           |

**Table S4.** Classification of lycophytes and ferns of Vietnam according to PPG 1 classification system. (Families in boldface were newly circumscribed for Vietnam).

| PPG I                 | Lycophytes and<br>Ferns of Vietnam<br>According to PPG 1 | Previous Treatments                                 |                     |                      |
|-----------------------|----------------------------------------------------------|-----------------------------------------------------|---------------------|----------------------|
|                       |                                                          | IFV<br>(1999)                                       | CPSV<br>(2001)      | Phan<br>(2010)       |
| LYCOPODIOPSIDA        |                                                          |                                                     |                     |                      |
| A. Lycopodiales       |                                                          |                                                     |                     |                      |
| 1. Lycopodiaceae      |                                                          |                                                     |                     |                      |
| Lycopodielloideae     | <i>Lycopodiella</i>                                      | not recognized                                      | <i>Lycopodiella</i> | Not included         |
| Lycopodioideae        | <i>Lycopodium</i>                                        | <i>Lycopodium</i>                                   | as IFV              | Not included         |
| Huperzioideae         | <i>Huperzia</i>                                          | <i>Huperzia</i>                                     | as IFV              | Not included         |
| B. Isoetales          |                                                          |                                                     |                     |                      |
| 2. Isoetaceae         | <i>Isoetes</i>                                           | <i>Isoetes</i>                                      | as IFV              | Not included         |
| C. Selaginellales     |                                                          |                                                     |                     |                      |
| 3. Selaginellaceae    | <i>Selaginella</i>                                       | <i>Selaginella</i>                                  | as IFV              | Not included         |
| POLYPODIOPSIDA        |                                                          |                                                     |                     |                      |
| Equisetidae           |                                                          |                                                     |                     |                      |
| D. Equisetales        |                                                          |                                                     |                     |                      |
| 4. Equisetaceae       | <i>Equisetum</i>                                         | <i>Equisetum</i>                                    | as IFV              | as IFV               |
| Ophioglossidae        |                                                          |                                                     |                     |                      |
| E. Psilotales         |                                                          |                                                     |                     |                      |
| 5. Psilotaceae        | <i>Psilotum</i>                                          | <i>Psilotum</i>                                     | as IFV              | as IFV               |
| F. Ophioglossales     |                                                          |                                                     |                     |                      |
| 6. Ophioglossaceae    |                                                          |                                                     |                     |                      |
| Helminthostachyoideae | <i>Helminthostachys</i>                                  | <i>Helminthostachys</i>                             | as IFV              | as IFV               |
| Ophioglossoideae      | <i>Ophioglossum</i>                                      | <i>Ophioglossum</i>                                 | as IFV              | as IFV               |
| Botrychioideae        | <i>Botrychium</i>                                        | <i>Botrychium</i>                                   | as IFV              | as IFV               |
| Marattidae            |                                                          |                                                     |                     |                      |
| G. Marattiales        |                                                          |                                                     |                     |                      |
| 7. Marattiaceae       | <i>Angiopteris</i>                                       | <i>Angiopteris</i>                                  | as IFV              | as IFV               |
|                       | (incl. <i>Archangiopteris</i> )                          | (incl. <i>Archangiopteris</i> )                     |                     |                      |
|                       | <i>Christensenia</i>                                     |                                                     |                     | <i>Christensenia</i> |
|                       | <i>Marattia</i>                                          | <i>Marattia</i>                                     | as IFV              | as IFV               |
| Polypodiidae          |                                                          |                                                     |                     |                      |
| H. Osmundales         |                                                          |                                                     |                     |                      |
| 8. Osmundaceae        | <i>Osmunda</i>                                           | <i>Osmunda</i>                                      | as IFV              | as IFV               |
| I. Hymenophyllales    |                                                          |                                                     |                     |                      |
| 9. Hymenophyllaceae   |                                                          |                                                     |                     |                      |
| Trichomanoideae       | <i>Abrodictyum</i>                                       |                                                     |                     | <i>Abrodictyum</i>   |
|                       | <i>Cephalomanes</i>                                      | <i>Cephalomanes</i>                                 | as IFV              | as IFV               |
|                       | <i>Crepidomanes</i>                                      | <i>Crepidomanes</i>                                 | as IFV              | as IFV               |
|                       | <i>Didymoglossum</i>                                     |                                                     |                     | <i>Didymoglossum</i> |
|                       | <i>Trichomanes</i>                                       | <i>Trichomanes</i>                                  | as IFV              | as IFV               |
|                       | <i>Vandenboschia</i>                                     | <i>Vandenboschia</i>                                | not recognized      | as IFV               |
| Hymenophylloideae     | <i>Hymenophyllum</i>                                     | <i>Hymenophyllum</i>                                | as IFV              | as IFV               |
| J. Gleicheniales      |                                                          |                                                     |                     |                      |
| 10. Dipteridaceae     | <i>Cheiropleuria</i>                                     | <i>Cheiropleuria</i><br>(in Cheiropleu-<br>riaceae) | as IFV              | <i>Cheiropleuria</i> |

| PPG I                  | Lycophytes and Ferns of Vietnam According to PPG 1 | Previous Treatments                      |                                    |                      |
|------------------------|----------------------------------------------------|------------------------------------------|------------------------------------|----------------------|
|                        |                                                    | IFV (1999)                               | CPSV (2001)                        | Phan (2010)          |
|                        | <i>Dipteris</i>                                    | <i>Dipteris</i>                          | as IFV                             | as IFV               |
|                        | <i>Dicranopteris</i>                               | <i>Dicranopteris</i>                     | as IFV                             | as IFV               |
| 11. Gleicheniaceae     | <i>Diplopterygium</i>                              | <i>Diplopterygium</i>                    | as IFV                             | as IFV               |
|                        | <i>Gleichenia</i>                                  | <i>Gleichenia</i>                        | as IFV                             | as IFV               |
| <b>K. Schizaeles</b>   |                                                    |                                          |                                    |                      |
| 12. Lygodiaceae        | <i>Lygodium</i>                                    | <i>Lygodium</i> (in Schizaeaceae)        | as IFV                             | <i>Lygodium</i>      |
| 13. Schizaeaceae       | <i>Schizaea</i>                                    | <i>Schizaea</i>                          | as IFV                             | as IFV               |
| <b>M. Salviniiales</b> |                                                    |                                          |                                    |                      |
| 14. Salviniaceae       | <i>Azolla</i>                                      | <i>Azolla</i> (in Azollaceae)            | as IFV                             | <i>Azolla</i>        |
|                        | <i>Salvinia</i>                                    | <i>Salvinia</i>                          | as IFV                             | <i>Salvinia</i>      |
| 15. Marsileaceae       | <i>Marsilea</i>                                    | <i>Marsilea</i>                          | as IFV                             | <i>Marsilea</i>      |
| <b>N. Cyatheaes</b>    |                                                    |                                          |                                    |                      |
| 16. Plagiogyriaceae    | <i>Plagiogyria</i>                                 | <i>Plagiogyria</i>                       | as IFV                             | as IFV               |
| 17. Cibotiaceae        | <i>Cibotium</i>                                    | <i>Cibotium</i> (in Thyrsopteridaceae)   | <i>Cibotium</i> (in Dicksoniaceae) | <i>Cibotium</i>      |
|                        | <i>Alsophila</i>                                   | not included                             | as IFV                             | <i>Alsophila</i>     |
| 18. Cyatheaceae        | <i>Cyathea</i>                                     | <i>Cyathea</i>                           | <i>Cyathea</i>                     | <i>Cyathea</i>       |
|                        | <i>Sphaeropteris</i>                               | not recognized                           | not recognized                     | <i>Sphaeropteris</i> |
| <b>O. Polypodiales</b> |                                                    |                                          |                                    |                      |
| Lindsaeineae           |                                                    |                                          |                                    |                      |
|                        | <i>Lindsaea</i>                                    | <i>Lindsaea</i> (in Dennstaedtiaceae)    | as IFV                             | <i>Lindsaea</i>      |
| 19. Lindsaeaceae       | <i>Sphenomeris</i>                                 | <i>Sphenomeris</i> (in Dennstaedtiaceae) | as IFV                             | <i>Sphenomeris</i>   |
|                        | <i>Tapeinidium</i>                                 | <i>Tapeinidium</i> (in Dennstaedtiaceae) | as IFV                             | <i>Tapeinidium</i>   |
| Pteridineae            |                                                    |                                          |                                    |                      |
| 20. Pteridaceae        | <i>Acrostichum</i>                                 | <i>Acrostichum</i>                       | as IFV                             | as IFV               |
| Parkerioideae          | <i>Ceratopteris</i>                                | <i>Ceratopteris</i> (in Parkeriaceae)    | as IFV                             | <i>Ceratopteris</i>  |
| Cryptogrammoideae      | <i>Coniogramme</i>                                 | <i>Coniogramme</i> (in Adiantaceae)      | as IFV                             | <i>Coniogramme</i>   |
|                        | <i>Anogramma</i>                                   | not recognized                           | not recognized                     | <i>Anogramma</i>     |
|                        | <i>Onychium</i>                                    | <i>Onychium</i> (in Adiantaceae)         | as IFV                             | <i>Onychium</i>      |
| Pteridoideae           | <i>Pityrogramma</i>                                | <i>Pityrogramma</i> (in Adiantaceae)     | as IFV                             | <i>Pityrogramma</i>  |
|                        | <i>Pteris</i>                                      | <i>Pteris</i>                            | as IFV                             | as IFV               |
|                        | <i>Syngamma</i>                                    | <i>Syngamma</i> (in Adiantaceae)         | as IFV                             | <i>Syngamma</i>      |

| PPG I                 | Lycophytes and Ferns of Vietnam According to PPG 1 | Previous Treatments                           |                                         |                                                    |
|-----------------------|----------------------------------------------------|-----------------------------------------------|-----------------------------------------|----------------------------------------------------|
|                       |                                                    | IFV (1999)                                    | CPSV (2001)                             | Phan (2010)                                        |
| Vittarioideae         | <i>Taenitis</i>                                    | <i>Taenitis</i><br>(in Adiantaceae)           | as IFV                                  | <i>Taenitis</i>                                    |
|                       | <i>Adiantum</i>                                    | <i>Adiantum</i><br>(in Adiantaceae)           | as IFV                                  | <i>Adiantum</i>                                    |
|                       | <i>Antrophyum</i>                                  | <i>Antrophyum</i><br>(in Vittariaceae)        | as IFV                                  | <i>Antrophyum</i>                                  |
|                       | <i>Vittaria</i>                                    | <i>Vittaria</i><br>(in Vittariaceae)          | as IFV                                  | <i>Vittaria</i>                                    |
| Cheilanthesoideae     | <i>Aleuritopteris</i>                              | not recognized                                | not recognized                          | <i>Aleuritopteris</i>                              |
|                       | <i>Hemionitis</i>                                  | <i>Hemionitis</i><br>(in Adiantaceae)         | as IFV                                  | <i>Hemionitis</i>                                  |
|                       | <i>Mildella</i>                                    | <i>Mildella</i><br>(in Adiantaceae)           | as IFV                                  | <i>Mildella</i>                                    |
|                       | <i>Notholaena</i>                                  | <i>Notholaena</i><br>(in Adiantaceae)         | as IFV                                  | <i>Notholaena</i>                                  |
| 21. Dennstaedtiaceae  | <i>Dennstaedtia</i>                                | <i>Dennstaedtia</i>                           | as IFV                                  | as IFV                                             |
|                       | <i>Histiopteris</i>                                | <i>Histiopteris</i>                           | as IFV                                  | as IFV                                             |
|                       | <i>Hypolepis</i>                                   | <i>Hypolepis</i>                              | as IFV                                  | as IFV                                             |
|                       | <i>Microlepia</i>                                  | <i>Microlepia</i>                             | as IFV                                  | as IFV                                             |
|                       | <i>Monachosorium</i>                               | <i>Monachosorium</i>                          | as IFV                                  | as IFV                                             |
| Aspleniineae          |                                                    |                                               |                                         |                                                    |
| 22. Cystopteridaceae  | <i>Acystopteris</i>                                | not recognized                                | not recognized                          | <i>Acystopteris</i><br>(incl. <i>Cystopteris</i> ) |
|                       | <i>Cystopteris</i>                                 | <i>Cystopteris</i><br>(in Aspleniaceae)       | <i>Cystopteris</i><br>(in Woodsiaceae)  | not recognized                                     |
| 23. Rhachidosoraceae  | <i>Rhachidosorus</i>                               | not recognized                                | not recognized                          | <i>Rhachidosorus</i><br>(in Woodsiaceae)           |
| 24. Diplaziopsidaceae | <i>Diplaziopsis</i>                                | not recognized                                | <i>Diplaziopsis</i><br>(in Woodsiaceae) | as CPSV                                            |
| 25. Aspleniaceae      | <i>Asplenium</i>                                   | <i>Asplenium</i>                              | as IFV                                  | as IFV                                             |
|                       | <i>Hymenoasplenium</i>                             | not recognized                                | not recognized                          | <i>Hymenoasplenium</i>                             |
| 26. Blechnaceae       |                                                    |                                               |                                         |                                                    |
| Stenochlaeoideae      | <i>Stenochlaena</i>                                | not recognized                                | <i>Stenochlaena</i>                     | as CPSV                                            |
| Woodwardioideae       | <i>Woodwardi</i>                                   | not recognized                                | <i>Woodwardi</i>                        | as CPSV                                            |
| Blechnoideae          | <i>Blechnum</i>                                    | <i>Blechnum</i>                               | as IFV                                  | as IFV                                             |
|                       | <i>Brainea</i>                                     | <i>Brainea</i>                                | as IFV                                  | as IFV                                             |
| 27. Athyriaceae       | <i>Athyrium</i>                                    | <i>Athyrium</i><br>(in Aspleniaceae)          | <i>Athyrium</i><br>(in Woodsiaceae)     | as CPSV                                            |
|                       | <i>Deparia</i>                                     | <i>Deparia</i><br>(incl. <i>Lunathyrium</i> ) | not recognized                          | <i>Deparia</i><br>(in Woodsiaceae)                 |
|                       | <i>Diplazium</i>                                   | <i>Diplazium</i><br>(in Aspleniaceae)         | <i>Diplazium</i><br>(in Woodsiaceae)    | as CPSV                                            |
| 28. Thelypteridaceae  |                                                    |                                               |                                         |                                                    |
| Phegopteridoideae     | <i>Macrothelypteris</i>                            | not recognized                                | <i>Macrothelypteris</i>                 | as CPSV                                            |
|                       | <i>Phegopteris</i>                                 | not recognized                                | <i>Phegopteris</i>                      | as CPSV                                            |

| PPG I                 | Lycophytes and Ferns of Vietnam According to PPG 1 | Previous Treatments                                |                                                 |                                                                                                                                                                                                                                                                                                             |
|-----------------------|----------------------------------------------------|----------------------------------------------------|-------------------------------------------------|-------------------------------------------------------------------------------------------------------------------------------------------------------------------------------------------------------------------------------------------------------------------------------------------------------------|
|                       |                                                    | IFV (1999)                                         | CPSV (2001)                                     | Phan (2010)                                                                                                                                                                                                                                                                                                 |
| Thelypteridoideae     | <i>Pseudophegopteris</i>                           | <i>Pseudophegopteris</i>                           | as IFV                                          | as IFV                                                                                                                                                                                                                                                                                                      |
|                       | <i>Ampelopteris</i>                                | <i>Ampelopteris</i>                                | as IFV                                          | not recognized                                                                                                                                                                                                                                                                                              |
|                       | <i>Christella</i>                                  | <i>Christella</i>                                  | as IFV                                          | not recognized                                                                                                                                                                                                                                                                                              |
|                       | <i>Coryphopteris</i>                               | <i>Coryphopteris</i>                               | as IFV                                          | not recognized                                                                                                                                                                                                                                                                                              |
|                       | <i>Cyclogramma</i>                                 | <i>Cyclogramma</i>                                 | as IFV                                          | not recognized                                                                                                                                                                                                                                                                                              |
|                       | <i>Cyclosorus</i>                                  | <i>Cyclosorus</i>                                  | as IFV                                          | <i>Cyclosorus</i> (incl. <i>Ampe-</i><br><i>lopteris</i> , <i>Christella</i> ,<br><i>Cyclogramma</i> ,<br><i>Glaphyopteridopsis</i> ,<br><i>Pneumatopteris</i> , <i>Pro-</i><br><i>nephrium</i> , <i>Pseudocy-</i><br><i>closorus</i> , <i>Stegno-</i><br><i>gramma</i> , <i>Trigono-</i><br><i>spora</i> ) |
|                       | <i>Glaphyopteridopsis</i>                          | not recognized                                     | <i>Glaphyopteridopsis</i>                       | not recognized                                                                                                                                                                                                                                                                                              |
|                       | <i>Metathelypteris</i>                             | <i>Metathelypteris</i>                             | as IFV                                          | not recognized                                                                                                                                                                                                                                                                                              |
|                       | <i>Parathelypteris</i>                             | not recognized                                     | <i>Parathelypteris</i>                          | not recognized                                                                                                                                                                                                                                                                                              |
|                       | <i>Pneumatopteris</i>                              | <i>Pneumatopteris</i>                              | as IFV                                          | not recognized                                                                                                                                                                                                                                                                                              |
|                       | <i>Pronephrium</i>                                 | <i>Pronephrium</i>                                 | as IFV                                          | not recognized                                                                                                                                                                                                                                                                                              |
|                       | <i>Pseudocyclosorus</i>                            | <i>Pseudocyclosorus</i>                            | as IFV                                          | not recognized                                                                                                                                                                                                                                                                                              |
|                       | <i>Stegnogramma</i>                                | <i>Stegnogramma</i>                                | as IFV                                          | not recognized                                                                                                                                                                                                                                                                                              |
|                       | <i>Thelypteris</i>                                 | <i>Thelypteris</i>                                 | as IFV                                          | <i>Thelypteris</i><br>(incl. <i>Thelypteris</i> ,<br><i>Metathelypteris</i> , <i>Para-</i><br><i>thelypteris</i> )                                                                                                                                                                                          |
| 29. Didymochlaenaceae | <i>Trigonospora</i>                                | <i>Trigonospora</i>                                | as IFV                                          | not recognized                                                                                                                                                                                                                                                                                              |
|                       | <i>Didymochlaena</i>                               | <i>Didymochlaena</i><br>(in Dryopteridaceae)       | as IFV                                          | as IFV                                                                                                                                                                                                                                                                                                      |
| 30. Hypodematiaceae   | <i>Hypodematium</i>                                | not recognized                                     | <i>Hypodematium</i><br>(in Woodsiaceae)         | <i>Hypodematium</i><br>(in Dryopteridaceae)                                                                                                                                                                                                                                                                 |
|                       | <i>Leucostegia</i>                                 | <i>Leucostegia</i><br>(in Davalliaceae)            | as IFV                                          | <i>Leucostegia</i> (Dryopteri-<br>daceae)                                                                                                                                                                                                                                                                   |
| 31. Dryopteridaceae   |                                                    |                                                    |                                                 |                                                                                                                                                                                                                                                                                                             |
| Polybotryoideae       | <i>Polystichopsis</i>                              | not recognized                                     | <i>Polystichopsis</i>                           | not recognized                                                                                                                                                                                                                                                                                              |
|                       | <i>Bolbitis</i>                                    | <i>Bolbitis</i><br>(in Lomariopsida-<br>ceae)      | as IFV                                          | <i>Bolbitis</i>                                                                                                                                                                                                                                                                                             |
|                       | <i>Elaphoglossum</i>                               | <i>Elaphoglossum</i><br>(in Lomariopsida-<br>ceae) | as IFV                                          | <i>Elaphoglossum</i>                                                                                                                                                                                                                                                                                        |
|                       | <i>Lomagramma</i>                                  | not recognized                                     | <i>Lomagramma</i><br>(in Lomariopsida-<br>ceae) | <i>Lomagramma</i>                                                                                                                                                                                                                                                                                           |
| Elaphoglosoideae      | <i>Pleocnemia</i>                                  | not recognized                                     | <i>Pleocnemia</i>                               | <i>Pleocnemia</i>                                                                                                                                                                                                                                                                                           |
|                       | <i>Rumohra</i>                                     | <i>Rumohra</i><br>(in Davalliaceae)                | as IFV                                          | <i>Rumohra</i>                                                                                                                                                                                                                                                                                              |
|                       | <i>Teratophyllum</i>                               | <i>Teratophyllum</i>                               | as IFV                                          | <i>Teratophyllum</i>                                                                                                                                                                                                                                                                                        |



| PPG I                | Lycophytes and Ferns of Vietnam According to PPG 1                                  | Previous Treatments                                             |                                      |                                                   |
|----------------------|-------------------------------------------------------------------------------------|-----------------------------------------------------------------|--------------------------------------|---------------------------------------------------|
|                      |                                                                                     | IFV (1999)<br>(in Lomariopsidaceae)                             | CPSV (2001)                          | Phan (2010)                                       |
| Dryopteridoideae     | <i>Arachniodes</i>                                                                  | <i>Arachniodes</i>                                              | as IFV                               | <i>Arachniodes</i> (incl. <i>Polystichopsis</i> ) |
|                      | <i>Ctenitis</i>                                                                     | <i>Ctenitis</i>                                                 | as IFV                               | as IFV                                            |
|                      | <i>Cyrtomium</i>                                                                    | <i>Cyrtomium</i>                                                | as IFV                               | as IFV                                            |
|                      | not recognized                                                                      | not recognized                                                  | not recognized                       | <i>Acrophorus</i>                                 |
|                      | not recognized                                                                      | not recognized                                                  | not recognized                       | <i>Acrorumohra</i>                                |
|                      | <i>Dryopteris</i> (incl. <i>Acrophorus</i> , <i>Acrorumohra</i> , <i>Dryopsis</i> ) | <i>Dryopteris</i>                                               | <i>Dryopteris</i>                    | <i>Dryopteris</i>                                 |
|                      | <i>Polystichum</i>                                                                  | <i>Polystichum</i>                                              | as IFV                               | as IFV                                            |
| 32. Nephrolepidaceae | <i>Nephrolepis</i>                                                                  | <i>Nephrolepis</i> (in Davalliaceae)                            | <i>Nephrolepis</i> (in Oleandraceae) | <i>Nephrolepis</i> (in Lomariopsidaceae)          |
| 33. Lomariopsidaceae | <i>Cyclopeltis</i>                                                                  | <i>Cyclopeltis</i> (in Dryopteridaceae)                         | as IFV                               | <i>Cyclopeltis</i>                                |
|                      | <i>Lomariopsis</i>                                                                  | <i>Lomariopsis</i>                                              | as IFV                               | as IFV                                            |
| 34. Tectariaceae     | <i>Arthropteris</i>                                                                 | <i>Arthropteris</i> (in Davalliaceae)                           | as IFV                               | <i>Arthropteris</i>                               |
|                      | <i>Pteridrys</i>                                                                    | <i>Pteridrys</i> (in Dryopteridaceae)                           | as IFV                               | <i>Pteridrys</i>                                  |
|                      | <i>Tectaria</i>                                                                     | <i>Tectaria</i> (in Dryopteridaceae)                            | as IFV                               | <i>Tectaria</i>                                   |
|                      | <i>Oleandra</i>                                                                     | <i>Oleandra</i> (in Davalliaceae)                               | <i>Oleandra</i>                      | as CPSV                                           |
| 35. Oleandraceae     |                                                                                     |                                                                 |                                      |                                                   |
| 36. Davalliaceae     | <i>Davallia</i>                                                                     | <i>Davallia</i> (incl. <i>Araiostegia</i> , <i>Davallodes</i> ) | as IFV                               | as IFV                                            |
| 37. Polypodiaceae    |                                                                                     |                                                                 |                                      |                                                   |
| Loxogrammoideae      | <i>Loxogramme</i>                                                                   | <i>Loxogramme</i> (in Grammitidaceae)                           | <i>Loxogramme</i>                    | as CPSV                                           |
| Platyserioideae      | <i>Platyserium</i>                                                                  | <i>Platyserium</i>                                              | as IFV                               | as IFV                                            |
|                      | <i>Pyrrosia</i>                                                                     | <i>Pyrrosia</i>                                                 | as IFV                               | as IFV                                            |
| Drynarioideae        | <i>Aglaomorpha</i>                                                                  | <i>Aglaomorpha</i> (incl. <i>Photinopteris</i> )                | <i>Aglaomorpha</i>                   | as CPSV                                           |
|                      | <i>Arthromeris</i>                                                                  | <i>Arthromeris</i>                                              | as IFV                               | as IFV                                            |
|                      | <i>Gymnogrammitis</i>                                                               | <i>Gymnogrammitis</i> (in Davalliaceae)                         | as IFV                               | <i>Gymnogrammitis</i>                             |
|                      | <i>Selliguea</i>                                                                    | <i>Selliguea</i>                                                | as IFV                               | as IFV                                            |
| Microsorioideae      | <i>Goniophlebium</i>                                                                | <i>Goniophlebium</i>                                            | as IFV                               | as IFV                                            |
|                      | <i>Lecanopteris</i>                                                                 | not recognized                                                  | <i>Lecanopteris</i>                  | <i>Lecanopteris</i>                               |
|                      | not recognized                                                                      | not recognized                                                  | not recognized                       | <i>Caobangia</i>                                  |
|                      | <i>Lemmaphyllum</i> (incl. <i>Caobangia</i> )                                       | <i>Lemmaphyllum</i>                                             | as IFV                               | as IFV                                            |
|                      | <i>Lepisorus</i>                                                                    | <i>Lepisorus</i>                                                | as IFV                               | as IFV                                            |
|                      | not recognized                                                                      | not recognized                                                  | not recognized                       | <i>Kontumia</i>                                   |

| PPG I           | Lycophytes and<br>Ferns of Vietnam<br>According to PPG 1 | Previous Treatments                              |                |                      |
|-----------------|----------------------------------------------------------|--------------------------------------------------|----------------|----------------------|
|                 |                                                          | IFV<br>(1999)                                    | CPSV<br>(2001) | Phan<br>(2010)       |
|                 | <i>Leptochilus</i><br>(incl. <i>Kontumia</i> )           | <i>Leptochilus</i>                               | as IFV         | as IFV               |
|                 | <i>Microsorium</i>                                       | <i>Microsorium</i>                               | as IFV         | as IFV               |
|                 | <i>Neocheiropteris</i>                                   | <i>Neocheiropteris</i>                           | as IFV         | as IFV               |
|                 | <i>Paragramma</i>                                        | <i>Paragramma</i>                                | as IFV         | as IFV               |
| Polypodioideae  | <i>Polypodium</i>                                        | <i>Polypodium</i>                                | as IFV         | as IFV               |
|                 | <i>Acrosorus</i>                                         | <i>Acrosorus</i><br>(in Grammitidaceae)          | as IFV         | <i>Acrosorus</i>     |
|                 | <i>Calymmodon</i>                                        | <i>Calymmodon</i><br>(in Grammitidaceae)         | as IFV         | <i>Calymmodon</i>    |
| Grammitidoideae | <i>Cochlidium</i>                                        | <i>Cochlidium</i><br>(incl. <i>Xiphopteris</i> ) | as IFV         | <i>Cochlidium</i>    |
|                 | <i>Grammitis</i>                                         | <i>Grammitis</i><br>(in Grammitidaceae)          | as IFV         | <i>Grammitis</i>     |
|                 | <i>Prosaptia</i>                                         | <i>Prosaptia</i><br>(in Grammitidaceae)          | as IFV         | <i>Prosaptia</i>     |
|                 | <i>Scleroglossum</i>                                     | <i>Scleroglossum</i><br>(in Grammitidaceae)      | as IFV         | <i>Scleroglossum</i> |

**Table S5.** Classification of gymnosperms of Vietnam according to the GPG classification system.

| GPG                                                      | Gymnosperms of Vietnam According to "GPG"      | IFV (1999)                               | CPSV (2001)                   | Nguyen and Thomas (2005) |
|----------------------------------------------------------|------------------------------------------------|------------------------------------------|-------------------------------|--------------------------|
| <b>SUBCLASS I. Cycadidae Pax</b>                         |                                                |                                          |                               |                          |
| <b>Order A. Cycadales Pers. ex Bercht. &amp; J.Presl</b> |                                                |                                          |                               |                          |
| 1. Cycadaceae                                            | <i>Cycas</i>                                   | as GPG                                   | as GPG                        | not recognized           |
| <b>SUBCLASS II. Ginkgoideae Engl.</b>                    |                                                |                                          |                               |                          |
| <b>Order B. Ginkgoales Gorozh.</b>                       |                                                |                                          |                               |                          |
| 2. Ginkgoaceae Engl.                                     | <i>Ginkgo</i>                                  | as GPG                                   | not recognized                | not recognized           |
| <b>SUBCLASS III. Gnetidae Pax</b>                        |                                                |                                          |                               |                          |
| <b>Order C. Gnetales Blume</b>                           |                                                |                                          |                               |                          |
| 3. Gnetaceae Blume                                       | <i>Gnetum</i>                                  | as GPG                                   | as GPG                        | not recognized           |
| <b>SUBCLASS IV. Pinidae Cronquist</b>                    |                                                |                                          |                               |                          |
| <b>Order D. Pinales Gorozh</b>                           |                                                |                                          |                               |                          |
| 4. Pinaceae Spreng. ex F.Rudolphi,                       | <i>Abies</i>                                   | as GPG                                   | as GPG                        | as GPG                   |
|                                                          | <i>Keteleeria</i>                              | as GPG                                   | as GPG                        | as GPG                   |
|                                                          | <i>Pinus</i>                                   | as GPG                                   | as GPG                        | as GPG                   |
|                                                          | <i>Pseudotsuga</i>                             | not recognized                           | not recognized                | as GPG                   |
|                                                          | <i>Tsuga</i>                                   | as GPG                                   | as GPG                        | as GPG                   |
| <b>Order E. Araucariales Gorozh.</b>                     |                                                |                                          |                               |                          |
| 5. Araucariaceae Henkel & W.Hochst.                      | <i>Araucaria</i>                               | not recognized                           | as GPG                        | not recognized           |
| 6. Podocarpaceae Endl.                                   | <i>Dacrycarpus</i>                             | not recognized                           | as GPG                        | as CPSV                  |
|                                                          | <i>Dacrydium</i>                               | as GPG                                   | as GPG                        | as GPG                   |
|                                                          | <i>Nageia</i>                                  | as GPG                                   | as GPG                        | as GPG                   |
|                                                          | not recognized                                 | <i>Decussocarpus</i>                     | not recognized                | not recognized           |
|                                                          | <i>Podocarpus</i>                              | as GPG                                   | (incl. <i>Decussocarpus</i> ) | as GPG                   |
| <b>Order F. Cupressales Link</b>                         |                                                |                                          |                               |                          |
| 7. Cupressaceae Gray                                     | <i>Cunninghamia</i>                            | <i>Cunninghamia</i> (in Taxodiaceae)     | as IFV                        | as GPG                   |
|                                                          | <i>Cryptomeria</i>                             | <i>Cryptomeria</i> (in Taxodiaceae)      | not recognized                | not recognized           |
|                                                          | <i>Glyptostrobus</i>                           | <i>Glyptostrobus</i> (in Taxodiaceae)    | as IFV                        | as GPG                   |
|                                                          | <i>Cupressus</i> (incl. <i>Xanthocyparis</i> ) | as GPG                                   | as GPG                        | as GPG                   |
|                                                          | <i>Fokienia</i>                                | as GPG                                   | as GPG                        | as GPG                   |
|                                                          | <i>Calocedrus</i>                              | as GPG                                   | as GPG                        | as GPG                   |
|                                                          | <i>Taiwania</i>                                | not recognized                           | not recognized                | as GPG                   |
|                                                          | <i>Taxus</i>                                   | <i>Taxus</i>                             | as IFV                        | as IFV                   |
| 8. Taxaceae Gray                                         | <i>Cephalotaxus</i>                            | <i>Cephalotaxus</i> (in Cephalotaxaceae) | as IFV                        | as IFV                   |

|  |                    |                                           |        |        |
|--|--------------------|-------------------------------------------|--------|--------|
|  | <i>Amentotaxus</i> | <i>Amentotaxus</i><br>(in Amentotaxaceae) | as GPG | as GPG |
|--|--------------------|-------------------------------------------|--------|--------|

**Table S6.** Comparison of angiosperm families of Vietnam following IFV, CPSV, and APG IV. (Families in **boldface** in IFV and CPSV have the same delimitation; Families in **boldface** in APG IV have the same delimitation as IFV and CPSV).

| APG IV families                           | IFV (1999-2003)                                                                                                                 | CPSV (2001-2005)                                                                                            |
|-------------------------------------------|---------------------------------------------------------------------------------------------------------------------------------|-------------------------------------------------------------------------------------------------------------|
| Acanthaceae Juss.                         | <b>Acanthaceae</b>                                                                                                              |                                                                                                             |
|                                           | <b>Verbenaceae:</b> <i>Avicennia</i>                                                                                            |                                                                                                             |
| Achariaceae Harms                         | Flacourtiaceae: <i>Hydnocarpus</i>                                                                                              | Flacourtiaceae: <i>Gynocardia</i> , <i>Hydnocarpus</i>                                                      |
| Acoraceae Martinov                        | <b>Araceae:</b> <i>Acorus</i>                                                                                                   |                                                                                                             |
| <b>Actinidiaceae</b> Gilg & Werderm.      | <b>Actinidiaceae</b>                                                                                                            |                                                                                                             |
| Adoxaceae E. Mey. (=Viburnaceae Raf.)     | <b>Caprifoliaceae:</b> <i>Sambucus</i> , <i>Viburnum</i>                                                                        |                                                                                                             |
| Aizoaceae Martinov                        | <b>Aizoaceae</b>                                                                                                                |                                                                                                             |
|                                           | not recognized                                                                                                                  | Tetragoniaceae                                                                                              |
| Akaniaceae Stapf                          | <b>Bretschneideraceae</b>                                                                                                       |                                                                                                             |
|                                           | <b>Alismataceae</b>                                                                                                             |                                                                                                             |
| Alismataceae Vent.                        | Butomaceae: <i>Tenagocharis</i> , <i>Limnocharis</i>                                                                            | Limonocharitaceae: <i>Tenagocharis</i> , <i>Limnocharis</i>                                                 |
| <b>Altingiaceae</b> Lindl.                | <b>Altingiaceae</b>                                                                                                             |                                                                                                             |
| Amaranthaceae Juss.                       | <b>Amaranthaceae</b>                                                                                                            |                                                                                                             |
|                                           | <b>Chenopodiaceae</b>                                                                                                           |                                                                                                             |
| Amaryllidaceae J. St.-Hil.                | Amaryllidaceae: <i>Agapanthus</i> , <i>Crinum</i> , <i>Lycoris</i> , <i>Narcissus</i> , <i>Pancratium</i> , <i>Zephyranthes</i> | Amaryllidaceae: <i>Crinum</i> , <i>Lycoris</i> , <i>Narcissus</i> , <i>Pancratium</i> , <i>Zephyranthes</i> |
|                                           | Liliaceae: <i>Allium</i>                                                                                                        | Alliaceae                                                                                                   |
| <b>Anacardiaceae</b> R. Br.               | <b>Anacardiaceae</b>                                                                                                            |                                                                                                             |
| <b>Ancistrocladaceae</b> Planch. ex Walp. | <b>Ancistrocladaceae</b>                                                                                                        |                                                                                                             |
| <b>Anisophylleaceae</b> Ridl.             | <b>Anisophylleaceae</b>                                                                                                         |                                                                                                             |
| <b>Annonaceae</b> Juss.                   | <b>Annonaceae</b>                                                                                                               |                                                                                                             |
| Apiaceae Lindl.                           | <b>Apiaceae:</b> excl. <i>Hydrocotyle</i>                                                                                       |                                                                                                             |
| Apocynaceae Juss.                         | <b>Apocynaceae</b>                                                                                                              |                                                                                                             |
|                                           | <b>Asclepiadaceae</b>                                                                                                           |                                                                                                             |
| <b>Aponogetonaceae</b> Planch.            | <b>Aponogetonaceae</b>                                                                                                          |                                                                                                             |
| <b>Aquifoliaceae</b> Bercht. & J. Presl   | <b>Aquifoliaceae</b>                                                                                                            |                                                                                                             |
| Araceae Juss.                             | <b>Araceae:</b> excl. <i>Acorus</i>                                                                                             |                                                                                                             |
|                                           | not recognized                                                                                                                  | Lemnaceae                                                                                                   |
| Araliaceae Juss.                          | <b>Araliaceae</b>                                                                                                               |                                                                                                             |
|                                           | <b>Apiaceae:</b> <i>Hydrocotyle</i>                                                                                             |                                                                                                             |
| <b>Arecaceae</b> Bercht. & J. Presl       | <b>Arecaceae</b>                                                                                                                |                                                                                                             |
| <b>Aristolochiaceae</b> Juss.             | <b>Aristolochiaceae</b>                                                                                                         |                                                                                                             |
|                                           | <b>Agavaceae:</b> <i>Agave</i>                                                                                                  |                                                                                                             |
|                                           | Liliaceae: <i>Asparagus</i>                                                                                                     | Asparagaceae                                                                                                |
| Asparagaceae Juss.                        | Liliaceae: <i>Aspidistra</i> , <i>Disporopsis</i> , <i>Disporum</i> , <i>Polygonatum</i> , <i>Tupistra</i>                      | Convallariaceae                                                                                             |
|                                           | Agavaceae: <i>Dracaena</i> , <i>Sansevieria</i>                                                                                 | Dracaenaceae                                                                                                |
|                                           | Agavaceae: <i>Urginea</i>                                                                                                       | Hyacinthaceae                                                                                               |

|                                                 |                                                       |                                                                                                     |
|-------------------------------------------------|-------------------------------------------------------|-----------------------------------------------------------------------------------------------------|
|                                                 | Agavaceae: <i>Nolina</i>                              | Nolinaceae: <i>Nolina</i>                                                                           |
|                                                 | Liliaceae: <i>Aloe</i>                                | Asphodelaceae                                                                                       |
| Asphodelaceae Juss.                             | Liliaceae: <i>Dianella</i>                            | Phormiaceae                                                                                         |
|                                                 | Liliaceae: <i>Hemerocallis</i>                        | Hemerocallidaceae                                                                                   |
| Asteliaceae Dumort.                             | not recognized                                        | Asteliaceae                                                                                         |
| <b>Asteraceae</b> Bercht. & J. Presl            | <b>Asteraceae</b>                                     |                                                                                                     |
| <b>Balanophoraceae</b> Rich.                    | <b>Balanophoraceae</b>                                |                                                                                                     |
| <b>Balsaminaceae</b> A. Rich.                   | <b>Balsaminaceae</b>                                  |                                                                                                     |
| <b>Basellaceae</b> Raf.                         | <b>Basellaceae</b>                                    |                                                                                                     |
| <b>Begoniaceae</b> C. Agardh                    | <b>Begoniaceae</b>                                    |                                                                                                     |
| <b>Berberidaceae</b> Juss.                      | <b>Berberidaceae</b>                                  |                                                                                                     |
| <b>Betulaceae</b> Gray                          | <b>Betulaceae</b>                                     |                                                                                                     |
| <b>Bignoniaceae</b> Juss.                       | <b>Bignoniaceae</b>                                   |                                                                                                     |
|                                                 | <b>Bixaceae</b>                                       |                                                                                                     |
| Bixaceae Kunth                                  | <b>Cochlospermaceae</b>                               |                                                                                                     |
| Bonnetiaceae L. Beauvis. ex Nakai               | not recognized                                        | Bonnetiaceae                                                                                        |
| <b>Boraginaceae</b> Juss.                       | <b>Boraginaceae</b>                                   |                                                                                                     |
| <b>Brassicaceae</b> Burnett (=Cruciferae Juss.) | <b>Brassicaceae</b>                                   |                                                                                                     |
| Bromeliaceae Juss.                              | not recognized                                        | Bromeliaceae                                                                                        |
| <b>Burmanniaceae</b> Blume                      | <b>Burmanniaceae</b>                                  |                                                                                                     |
| Burseraceae Kunth                               | Burseraceae                                           | Anacardiaceae: <i>Bursera</i> , <i>Canarium</i> , <i>Dacryodes</i> , <i>Garuga</i> , <i>Protium</i> |
| <b>Buxaceae</b> Dumort.                         | <b>Buxaceae</b>                                       |                                                                                                     |
| <b>Cabombaceae</b> Rich ex A. Rich.             | <b>Cabombaceae</b>                                    |                                                                                                     |
| <b>Cactaceae</b> Juss.                          | <b>Cactaceae</b>                                      |                                                                                                     |
| Calophyllaceae J. Agardh                        | <b>Clusiaceae</b> : <i>Calophyllum</i> , <i>Mesua</i> |                                                                                                     |
| Calycanthaceae Lindl.                           | not recognized                                        | Calycanthaceae                                                                                      |
| Campanulaceae Juss.                             | <b>Campanulaceae</b> : excl. <i>Pentaphragma</i>      |                                                                                                     |
|                                                 | <b>Lobeliaceae</b>                                    |                                                                                                     |
| Cannabaceae Marti-nov                           | <b>Cannabaceae</b>                                    |                                                                                                     |
|                                                 | <b>Ulmaceae</b> : excl. <i>Ulmus</i>                  |                                                                                                     |
| <b>Cannaceae</b> Juss.                          | <b>Cannaceae</b>                                      |                                                                                                     |
| Capparaceae Juss.                               | <b>Capparaceae</b> : excl. <i>Cleome</i>              |                                                                                                     |
|                                                 | Caprifoliaceae: <i>Lonicera</i>                       | Caprifoliaceae: <i>Abelia</i> , <i>Lonicera</i>                                                     |
| Caprifoliaceae Juss.                            | <b>Dipsacaceae</b>                                    |                                                                                                     |
|                                                 | <b>Valerianaceae</b>                                  |                                                                                                     |
| Cardiopteridaceae Blume                         | <b>Cardiopteridaceae</b>                              |                                                                                                     |
|                                                 | <b>Icacinaceae</b> : <i>Gonocaryum</i>                |                                                                                                     |
| <b>Caricaceae</b> Dumort.                       | <b>Caricaceae</b>                                     |                                                                                                     |
|                                                 | <b>Rubiaceae</b> : <i>Carlemannia</i>                 |                                                                                                     |

|                                         |                                                                                           |                          |
|-----------------------------------------|-------------------------------------------------------------------------------------------|--------------------------|
| Carlemanniaceae<br>Airy Shaw            | <b>Caprifoliaceae:</b> <i>Silvianthus</i>                                                 |                          |
| <b>Caryophyllaceae</b><br>Juss.         | <b>Caryophyllaceae</b>                                                                    |                          |
| <b>Casuarinaceae</b> R. Br.             | <b>Casuarinaceae</b>                                                                      |                          |
| Celastraceae R. Br.                     | <b>Celastraceae</b><br>not recognized                                                     | Siphonodontataceae       |
| <b>Ceratophyllaceae</b><br>Gray         | <b>Ceratophyllaceae</b>                                                                   |                          |
| <b>Chloranthaceae</b> R.<br>Br. ex Sims | <b>Chloranthaceae</b>                                                                     |                          |
| Chrysobalanaceae R.<br>Br.              | Rosaceae: <i>Chrysobalanus</i> , <i>Parinari</i>                                          | Chrysobalanaceae         |
| Cleomaceae Bercht. &<br>J. Presl        | <b>Capparaceae:</b> <i>Cleome</i>                                                         |                          |
| <b>Clethraceae</b> Klotzsch             | <b>Clethraceae</b>                                                                        |                          |
| Clusiaceae Lindl.                       | <b>Clusiaceae:</b> <i>Garcinia</i>                                                        |                          |
| Colchicaceae DC.                        | <b>Liliaceae:</b> <i>Gloriosa</i> , <i>Iphigenia</i><br><b>Liliaceae:</b> <i>Disporum</i> |                          |
| <b>Combretaceae</b> R. Br.              | <b>Combretaceae</b>                                                                       |                          |
| <b>Commelinaceae</b><br>Mirb.           | <b>Commelinaceae</b>                                                                      |                          |
| <b>Connaraceae</b> R. Br.               | <b>Connaraceae</b>                                                                        |                          |
| Convolvulaceae Juss.                    | <b>Convolvulaceae</b><br>not recognized                                                   | Cuscutaceae              |
| Cornaceae Bercht. &<br>J. Presl         | Cornaceae: <i>Cornus</i>                                                                  | Cornaceae                |
| Costaceae Nakai                         | Zingiberaceae: <i>Costus</i>                                                              | Costaceae: <i>Costus</i> |
| <b>Crassulaceae</b> J.St.-<br>Hil.      | <b>Crassulaceae</b>                                                                       |                          |
| <b>Crypteroniaceae</b> A.<br>DC.        | <b>Crypteroniaceae</b>                                                                    |                          |
| <b>Cucurbitaceae</b> Juss.              | <b>Cucurbitaceae</b>                                                                      |                          |
| Cymodoceaceae<br>Vines                  | Zannichelliaceae                                                                          | Cymodoceaceae            |
| <b>Cyperaceae</b> Juss.                 | <b>Cyperaceae</b>                                                                         |                          |
| <b>Daphniphyllaceae</b><br>Mull. Arg.   | <b>Daphniphyllaceae</b>                                                                   |                          |
| <b>Datiscaceae</b> Dumort.              | <b>Datiscaceae</b>                                                                        |                          |
| Diapensiaceae Lindl.                    | not recognized                                                                            | Diapensiaceae            |
| <b>Dichapetalaceae</b><br>Baill.        | <b>Dichapetalaceae</b>                                                                    |                          |
| <b>Dilleniaceae</b> Salisb.             | <b>Dilleniaceae</b>                                                                       |                          |
| Dioscoreaceae R. Br.                    | <b>Dioscoreaceae</b><br><b>Taccaceae</b>                                                  |                          |
| Dipentodontaceae<br>Merr.               | not recognized                                                                            | Dipentodontaceae         |
| <b>Dipterocarpaceae</b><br>Blume        | <b>Dipterocarpaceae</b>                                                                   |                          |
| <b>Droseraceae</b> Salisb.              | <b>Droseraceae</b>                                                                        |                          |

|                                        |                                                                                                                                                                                                                                                                                                                                                                                                                                                                                                                                                                                                                                                                                                                                                                                                                         |                                                                                                                                                                                                                                                                                                                                                                                                                                                                                                                                                                                                                                                                                                                                                                                                                                                                  |
|----------------------------------------|-------------------------------------------------------------------------------------------------------------------------------------------------------------------------------------------------------------------------------------------------------------------------------------------------------------------------------------------------------------------------------------------------------------------------------------------------------------------------------------------------------------------------------------------------------------------------------------------------------------------------------------------------------------------------------------------------------------------------------------------------------------------------------------------------------------------------|------------------------------------------------------------------------------------------------------------------------------------------------------------------------------------------------------------------------------------------------------------------------------------------------------------------------------------------------------------------------------------------------------------------------------------------------------------------------------------------------------------------------------------------------------------------------------------------------------------------------------------------------------------------------------------------------------------------------------------------------------------------------------------------------------------------------------------------------------------------|
| <b>Ebenaceae</b> Gurke                 | <b>Ebenaceae</b>                                                                                                                                                                                                                                                                                                                                                                                                                                                                                                                                                                                                                                                                                                                                                                                                        |                                                                                                                                                                                                                                                                                                                                                                                                                                                                                                                                                                                                                                                                                                                                                                                                                                                                  |
| <b>Elaeagnaceae</b> Juss.              | <b>Elaeagnaceae</b>                                                                                                                                                                                                                                                                                                                                                                                                                                                                                                                                                                                                                                                                                                                                                                                                     |                                                                                                                                                                                                                                                                                                                                                                                                                                                                                                                                                                                                                                                                                                                                                                                                                                                                  |
| <b>Elaeocarpaceae</b> Juss.            | <b>Elaeocarpaceae</b>                                                                                                                                                                                                                                                                                                                                                                                                                                                                                                                                                                                                                                                                                                                                                                                                   |                                                                                                                                                                                                                                                                                                                                                                                                                                                                                                                                                                                                                                                                                                                                                                                                                                                                  |
| <b>Elatinaceae</b> Dumort.             | <b>Elatinaceae</b>                                                                                                                                                                                                                                                                                                                                                                                                                                                                                                                                                                                                                                                                                                                                                                                                      |                                                                                                                                                                                                                                                                                                                                                                                                                                                                                                                                                                                                                                                                                                                                                                                                                                                                  |
|                                        | <b>Ericaceae</b>                                                                                                                                                                                                                                                                                                                                                                                                                                                                                                                                                                                                                                                                                                                                                                                                        |                                                                                                                                                                                                                                                                                                                                                                                                                                                                                                                                                                                                                                                                                                                                                                                                                                                                  |
| Ericaceae Juss.                        | <b>Epacridaceae</b>                                                                                                                                                                                                                                                                                                                                                                                                                                                                                                                                                                                                                                                                                                                                                                                                     |                                                                                                                                                                                                                                                                                                                                                                                                                                                                                                                                                                                                                                                                                                                                                                                                                                                                  |
|                                        | not recognized                                                                                                                                                                                                                                                                                                                                                                                                                                                                                                                                                                                                                                                                                                                                                                                                          | <b>Pyrolaceae</b>                                                                                                                                                                                                                                                                                                                                                                                                                                                                                                                                                                                                                                                                                                                                                                                                                                                |
| <b>Eriocaulaceae</b> Marti-<br>nov     | <b>Eriocaulaceae</b>                                                                                                                                                                                                                                                                                                                                                                                                                                                                                                                                                                                                                                                                                                                                                                                                    |                                                                                                                                                                                                                                                                                                                                                                                                                                                                                                                                                                                                                                                                                                                                                                                                                                                                  |
| <b>Erythroxylaceae</b><br>Kunth        | <b>Erythroxylaceae</b>                                                                                                                                                                                                                                                                                                                                                                                                                                                                                                                                                                                                                                                                                                                                                                                                  |                                                                                                                                                                                                                                                                                                                                                                                                                                                                                                                                                                                                                                                                                                                                                                                                                                                                  |
| Escallonoideae R. Br.<br>ex Dumort.    | Saxifragaceae: <i>Polyosma</i>                                                                                                                                                                                                                                                                                                                                                                                                                                                                                                                                                                                                                                                                                                                                                                                          | Escallonoideae: <i>Polyosma</i>                                                                                                                                                                                                                                                                                                                                                                                                                                                                                                                                                                                                                                                                                                                                                                                                                                  |
| <b>Eucommiaceae</b> Engl.              | <b>Eucommiaceae</b>                                                                                                                                                                                                                                                                                                                                                                                                                                                                                                                                                                                                                                                                                                                                                                                                     |                                                                                                                                                                                                                                                                                                                                                                                                                                                                                                                                                                                                                                                                                                                                                                                                                                                                  |
| Euphorbiaceae Juss.                    | Euphorbiaceae: <i>Acalypha</i> , <i>Alchornea</i> , <i>Aleurites</i> , <i>Baliospermum</i> , <i>Blachia</i> , <i>Chaetocarpus</i> , <i>Cladogynos</i> , <i>Claoxylon</i> , <i>Cleidiocarpon</i> , <i>Cleidion</i> , <i>Cnesmone</i> , <i>Codiaeum</i> , <i>Croton</i> , <i>Dalechampia</i> , <i>Duetzianthus</i> , <i>Dimorphocalyx</i> , <i>Endospermum</i> , <i>Epiperinus</i> , <i>Erismanthus</i> , <i>Euphorbia</i> , <i>Excoecaria</i> , <i>Hevea</i> , <i>Homonoia</i> , <i>Hura</i> , <i>Jatropha</i> , <i>Lasiococca</i> , <i>Macaranga</i> , <i>Mallotus</i> , <i>Manihot</i> , <i>Melanolepis</i> , <i>Ostodes</i> , <i>Pachystylidium</i> , <i>Pedilanthus</i> , <i>Ricinus</i> , <i>Strophoblachia</i> , <i>Sumbaviopsis</i> , <i>Suregada</i> , <i>Trevisa</i> , <i>Trigonostemon</i> , <i>Vernicia</i> . | Euphorbiaceae: <i>Acalypha</i> , <i>Alchornea</i> , <i>Aleurites</i> , <i>Baliospermum</i> , <i>Blachia</i> , <i>Chaetocarpus</i> , <i>Cladogynos</i> , <i>Claoxylon</i> , <i>Cleidiocarpon</i> , <i>Cleidion</i> , <i>Cnesmone</i> , <i>Codiaeum</i> , <i>Croton</i> , <i>Dalechampia</i> , <i>Duetzianthus</i> , <i>Dimorphocalyx</i> , <i>Endospermum</i> , <i>Epiperinus</i> , <i>Erismanthus</i> , <i>Euphorbia</i> , <i>Excoecaria</i> , <i>Hevea</i> , <i>Homonoia</i> , <i>Hura</i> , <i>Jatropha</i> , <i>Koilodepas</i> , <i>Lasiococca</i> , <i>Macaranga</i> , <i>Mallotus</i> , <i>Manihot</i> , <i>Melanolepis</i> , <i>Mercurialis</i> , <i>Ostodes</i> , <i>Pachystylidium</i> , <i>Pedilanthus</i> , <i>Ricinus</i> , <i>Strophoblachia</i> , <i>Sumbaviopsis</i> , <i>Suregada</i> , <i>Trevisa</i> , <i>Trigonostemon</i> , <i>Vernicia</i> . |
|                                        | <b>Cesalpiniaceae</b>                                                                                                                                                                                                                                                                                                                                                                                                                                                                                                                                                                                                                                                                                                                                                                                                   |                                                                                                                                                                                                                                                                                                                                                                                                                                                                                                                                                                                                                                                                                                                                                                                                                                                                  |
| Fabaceae Lindl.                        | <b>Fabaceae</b>                                                                                                                                                                                                                                                                                                                                                                                                                                                                                                                                                                                                                                                                                                                                                                                                         |                                                                                                                                                                                                                                                                                                                                                                                                                                                                                                                                                                                                                                                                                                                                                                                                                                                                  |
|                                        | <b>Cesalpiniaceae</b>                                                                                                                                                                                                                                                                                                                                                                                                                                                                                                                                                                                                                                                                                                                                                                                                   |                                                                                                                                                                                                                                                                                                                                                                                                                                                                                                                                                                                                                                                                                                                                                                                                                                                                  |
| <b>Fagaceae</b> Dumort.                | <b>Fagaceae</b>                                                                                                                                                                                                                                                                                                                                                                                                                                                                                                                                                                                                                                                                                                                                                                                                         |                                                                                                                                                                                                                                                                                                                                                                                                                                                                                                                                                                                                                                                                                                                                                                                                                                                                  |
| <b>Flagellariaceae</b> Dumort.         | <b>Flagellariaceae</b>                                                                                                                                                                                                                                                                                                                                                                                                                                                                                                                                                                                                                                                                                                                                                                                                  |                                                                                                                                                                                                                                                                                                                                                                                                                                                                                                                                                                                                                                                                                                                                                                                                                                                                  |
| Garryaceae Lindl.                      | Cornaceae: <i>Aucuba</i>                                                                                                                                                                                                                                                                                                                                                                                                                                                                                                                                                                                                                                                                                                                                                                                                | <b>Aucubaceae</b>                                                                                                                                                                                                                                                                                                                                                                                                                                                                                                                                                                                                                                                                                                                                                                                                                                                |
|                                        | <b>Gentianaceae</b>                                                                                                                                                                                                                                                                                                                                                                                                                                                                                                                                                                                                                                                                                                                                                                                                     |                                                                                                                                                                                                                                                                                                                                                                                                                                                                                                                                                                                                                                                                                                                                                                                                                                                                  |
| Gentianaceae Juss.                     | <b>Potaliaceae</b>                                                                                                                                                                                                                                                                                                                                                                                                                                                                                                                                                                                                                                                                                                                                                                                                      |                                                                                                                                                                                                                                                                                                                                                                                                                                                                                                                                                                                                                                                                                                                                                                                                                                                                  |
| <b>Geraniaceae</b> Juss.               | <b>Geraniaceae</b>                                                                                                                                                                                                                                                                                                                                                                                                                                                                                                                                                                                                                                                                                                                                                                                                      |                                                                                                                                                                                                                                                                                                                                                                                                                                                                                                                                                                                                                                                                                                                                                                                                                                                                  |
| <b>Gesneriaceae</b> Rich. &<br>Juss.   | <b>Gesneriaceae</b>                                                                                                                                                                                                                                                                                                                                                                                                                                                                                                                                                                                                                                                                                                                                                                                                     |                                                                                                                                                                                                                                                                                                                                                                                                                                                                                                                                                                                                                                                                                                                                                                                                                                                                  |
| Gisekiaceae Nakai                      | Aizoaceae: <i>Gisekia</i>                                                                                                                                                                                                                                                                                                                                                                                                                                                                                                                                                                                                                                                                                                                                                                                               | Molluginaceae: <i>Gisekia</i>                                                                                                                                                                                                                                                                                                                                                                                                                                                                                                                                                                                                                                                                                                                                                                                                                                    |
| <b>Goodeniaceae</b> R. Br.<br>ex Rich. | <b>Goodeniaceae</b>                                                                                                                                                                                                                                                                                                                                                                                                                                                                                                                                                                                                                                                                                                                                                                                                     |                                                                                                                                                                                                                                                                                                                                                                                                                                                                                                                                                                                                                                                                                                                                                                                                                                                                  |
| <b>Haloragaceae</b> R. Br.             | <b>Haloragaceae</b>                                                                                                                                                                                                                                                                                                                                                                                                                                                                                                                                                                                                                                                                                                                                                                                                     |                                                                                                                                                                                                                                                                                                                                                                                                                                                                                                                                                                                                                                                                                                                                                                                                                                                                  |
| <b>Hamamelidaceae</b> R.<br>Br.        | <b>Hamamelidaceae</b>                                                                                                                                                                                                                                                                                                                                                                                                                                                                                                                                                                                                                                                                                                                                                                                                   |                                                                                                                                                                                                                                                                                                                                                                                                                                                                                                                                                                                                                                                                                                                                                                                                                                                                  |
| <b>Hanguanaceae</b> Airy<br>Shaw       | <b>Hanguanaceae</b>                                                                                                                                                                                                                                                                                                                                                                                                                                                                                                                                                                                                                                                                                                                                                                                                     |                                                                                                                                                                                                                                                                                                                                                                                                                                                                                                                                                                                                                                                                                                                                                                                                                                                                  |
| <b>Heliconiaceae</b> Vines             | <b>Heliconiaceae</b>                                                                                                                                                                                                                                                                                                                                                                                                                                                                                                                                                                                                                                                                                                                                                                                                    |                                                                                                                                                                                                                                                                                                                                                                                                                                                                                                                                                                                                                                                                                                                                                                                                                                                                  |
| Helwingiaceae<br>Decne.                | Cornaceae: <i>Helwingia</i>                                                                                                                                                                                                                                                                                                                                                                                                                                                                                                                                                                                                                                                                                                                                                                                             | <b>Helwingiaceae</b>                                                                                                                                                                                                                                                                                                                                                                                                                                                                                                                                                                                                                                                                                                                                                                                                                                             |



|                                         |                                                                                                                                                                                                                                                                                                                                |                       |
|-----------------------------------------|--------------------------------------------------------------------------------------------------------------------------------------------------------------------------------------------------------------------------------------------------------------------------------------------------------------------------------|-----------------------|
| <b>Hernandiaceae</b><br>Blume           | <b>Hernandiaceae</b>                                                                                                                                                                                                                                                                                                           |                       |
| <b>Hydrangeaceae</b> Du-mort.           | <b>Hydrangeaceae</b>                                                                                                                                                                                                                                                                                                           |                       |
| <b>Hydrocharitaceae</b><br>Juss.        | <b>Hydrocharitaceae</b>                                                                                                                                                                                                                                                                                                        |                       |
| <b>Hydroleaceae</b> R. Br.              | <b>Hydroleaceae</b>                                                                                                                                                                                                                                                                                                            |                       |
| <b>Hypericaceae</b> Juss.               | <b>Clusiaceae:</b> <i>Cratoxylum</i> , <i>Hypericum</i>                                                                                                                                                                                                                                                                        | <b>Hypericaceae</b>   |
| <b>Hypoxidaceae</b> R. Br.              | <b>Amaryllidaceae:</b> <i>Curculigo</i> , <i>Hypoxis</i>                                                                                                                                                                                                                                                                       | <b>Hypoxidaceae</b>   |
| <b>Icacinaceae</b> Miers                | <b>Icacinaceae:</b> excl. <i>Gomphandra</i> , <i>Gonocaryum</i>                                                                                                                                                                                                                                                                |                       |
| <b>Iridaceae</b> Juss.                  | <b>Iridaceae</b>                                                                                                                                                                                                                                                                                                               |                       |
| <b>Iteaceae</b> J. Agardh               | <b>Saxifragaceae:</b> <i>Itea</i>                                                                                                                                                                                                                                                                                              | <b>Iteaceae</b>       |
| <b>Ixonanthaceae</b><br>Planch. ex Miq. | <b>Ixonanthaceae</b>                                                                                                                                                                                                                                                                                                           |                       |
| <b>Juglandaceae</b> DC. Ex              | <b>Juglandaceae</b>                                                                                                                                                                                                                                                                                                            |                       |
| Perleb                                  | <b>Rhoipteleaceae</b>                                                                                                                                                                                                                                                                                                          |                       |
| <b>Juncaceae</b> Juss.                  | <b>Juncaceae</b>                                                                                                                                                                                                                                                                                                               |                       |
|                                         | <b>Lamiaceae</b>                                                                                                                                                                                                                                                                                                               |                       |
| <b>Lamiaceae</b> Martinov               | <b>Verbenaceae:</b> <i>Callicarpa</i> , <i>Caryopteris</i> ,<br><i>Clerodendron</i> , <i>Congea</i> , <i>Garrettia</i> , <i>Gmelina</i> ,<br><i>Hymenopyramis</i> , <i>Karomia</i> , <i>Prema</i> , <i>Schnabelia</i> ,<br><i>Sphenodesme</i> , <i>Tectona</i> , <i>Teijsmanniodendron</i> ,<br><i>Tsoongia</i> , <i>Vitex</i> |                       |
| <b>Lardizabalaceae</b> R. Br.           | <b>Lardizabalaceae</b>                                                                                                                                                                                                                                                                                                         |                       |
|                                         | <b>Sargentodoxaceae</b>                                                                                                                                                                                                                                                                                                        |                       |
| <b>Lauraceae</b> Juss.                  | <b>Lauraceae</b>                                                                                                                                                                                                                                                                                                               |                       |
| <b>Lecythidaceae</b> A. Rich.           | <b>Lecythidaceae</b>                                                                                                                                                                                                                                                                                                           |                       |
| <b>Lentibulariaceae</b><br>Rich.        | <b>Lentibulariaceae</b>                                                                                                                                                                                                                                                                                                        |                       |
| <b>Liliaceae</b> Juss.                  | <b>Liliaceae:</b> <i>Lilium</i>                                                                                                                                                                                                                                                                                                | <b>Liliaceae</b> s.s. |
| <b>Linaceae</b> DC. ex                  | <b>Linaceae</b>                                                                                                                                                                                                                                                                                                                |                       |
| Perleb.                                 | <b>Sabiaceae:</b> <i>Hugonia</i> , <i>Indoroucheria</i>                                                                                                                                                                                                                                                                        | <b>Hugoniaceae</b>    |
| <b>Linderniaceae</b> Borsch et al.      | <b>Scrophulariaceae:</b> <i>Legazpia</i> , <i>Linderna</i> , <i>Pic-<br/>ria</i> , <i>Pierranthus</i> , <i>Torenia</i>                                                                                                                                                                                                         |                       |
| <b>Loganiaceae</b> R. Br. ex Mart.      | <b>Loganiaceae:</b> <i>Mitrasacme</i> , <i>Mitreola</i> , <i>Strych-<br/>nos</i>                                                                                                                                                                                                                                               |                       |
| <b>Loranthaceae</b> Juss.               | <b>Loranthaceae</b>                                                                                                                                                                                                                                                                                                            |                       |
|                                         | <b>Saxifragaceae:</b> <i>Pilostigma</i>                                                                                                                                                                                                                                                                                        |                       |
| <b>Lowiaceae</b> Ridl.                  | <b>Lowiaceae</b>                                                                                                                                                                                                                                                                                                               |                       |
|                                         | <b>Lythraceae</b>                                                                                                                                                                                                                                                                                                              |                       |
|                                         | <b>Punicaceae</b>                                                                                                                                                                                                                                                                                                              |                       |
| <b>Lythraceae</b> J. St.-Hil.           | <b>Sonneratiaceae</b>                                                                                                                                                                                                                                                                                                          |                       |
|                                         | <b>Trapaceae</b>                                                                                                                                                                                                                                                                                                               |                       |
| <b>Magnoliaceae</b> Juss.               | <b>Magnoliaceae</b>                                                                                                                                                                                                                                                                                                            |                       |
| <b>Malpighiaceae</b> Juss.              | <b>Malpighiaceae</b>                                                                                                                                                                                                                                                                                                           |                       |
|                                         | <b>Bombacaceae</b>                                                                                                                                                                                                                                                                                                             |                       |
|                                         | <b>Malvaceae</b>                                                                                                                                                                                                                                                                                                               |                       |
| <b>Malvaceae</b> Juss.                  | <b>Sterculiaceae</b>                                                                                                                                                                                                                                                                                                           |                       |
|                                         | <b>Tiliaceae</b>                                                                                                                                                                                                                                                                                                               |                       |

|                                     |                                                                                                                   |                                                                                                                                     |
|-------------------------------------|-------------------------------------------------------------------------------------------------------------------|-------------------------------------------------------------------------------------------------------------------------------------|
| <b>Marantaceae</b> R. Br.           | <b>Marantaceae</b>                                                                                                |                                                                                                                                     |
| <b>Martyniaceae</b> Horan.          | <b>Martyniaceae</b>                                                                                               |                                                                                                                                     |
| Mazaceae Reveal                     | <b>Scrophulariaceae:</b> <i>Mazus</i>                                                                             |                                                                                                                                     |
| Melanthiaceae Batsch<br>ex Borkh.   | Liliaceae: <i>Paris</i>                                                                                           | Trilliaceae                                                                                                                         |
| <b>Melastomataceae</b><br>Juss.     | <b>Melastomataceae</b>                                                                                            |                                                                                                                                     |
| <b>Meliaceae</b> Juss.              | <b>Meliaceae</b>                                                                                                  |                                                                                                                                     |
| <b>Menispermaceae</b><br>Juss.      | <b>Menispermaceae</b>                                                                                             |                                                                                                                                     |
| <b>Menyanthaceae</b> Du-<br>mort.   | <b>Menyanthaceae</b>                                                                                              |                                                                                                                                     |
| Mitrastemonaceae<br>Makino          | <b>Rafflesiaceae:</b> <i>Mitrastemon</i>                                                                          |                                                                                                                                     |
| Molluginaceae Bartl.                | <b>Molluginaceae:</b> <i>Glinus, Mollugo</i>                                                                      |                                                                                                                                     |
| <b>Monimiaceae</b> Juss.            | <b>Monimiaceae</b>                                                                                                |                                                                                                                                     |
| <b>Moraceae</b> Gaudich.            | <b>Moraceae</b>                                                                                                   |                                                                                                                                     |
| <b>Moringaceae</b> Marti-<br>nov    | <b>Moringaceae</b>                                                                                                |                                                                                                                                     |
| <b>Musaceae</b> Juss.               | <b>Musaceae</b>                                                                                                   |                                                                                                                                     |
| <b>Myricaceae</b> Rich. ex<br>Kunth | <b>Myricaceae</b>                                                                                                 |                                                                                                                                     |
| <b>Myristicaceae</b> R. Br.         | <b>Myristicaceae</b>                                                                                              |                                                                                                                                     |
| <b>Myrtaceae</b> Juss.              | <b>Myrtaceae</b>                                                                                                  |                                                                                                                                     |
| <b>Nelumbonaceae</b> A.<br>Rich.    | <b>Nelumbonaceae</b>                                                                                              |                                                                                                                                     |
| <b>Nepenthaceae</b> Du-<br>mort     | <b>Nepenthaceae</b>                                                                                               |                                                                                                                                     |
| <b>Nyctaginaceae</b> Juss.          | <b>Nyctaginaceae</b>                                                                                              |                                                                                                                                     |
| Nymphaeaceae                        | <b>Nymphaeaceae</b>                                                                                               |                                                                                                                                     |
| Salisb.                             | <b>Barclayaceae</b>                                                                                               |                                                                                                                                     |
| Nyssaceae Juss. ex<br>Dumort.       | Cornaceae: <i>Mastixia</i>                                                                                        | Mastixiaceae                                                                                                                        |
|                                     | <b>Nyssaceae</b>                                                                                                  |                                                                                                                                     |
|                                     | not recognized                                                                                                    | Davidiaceae                                                                                                                         |
| <b>Ochnaceae</b> DC.                | <b>Ochnaceae</b>                                                                                                  |                                                                                                                                     |
|                                     | <b>Oleaceae</b>                                                                                                   |                                                                                                                                     |
| Olacaceae R. Br.                    | Oleaceae: <i>Erythralpalum</i>                                                                                    | Erythralpalaceae                                                                                                                    |
| Oleaceae Hoffmanns.<br>& Link       | Oleaceae: excl. <i>Erythralpalum</i>                                                                              | Oleaceae                                                                                                                            |
| <b>Opiliaceae</b> Veleton           | <b>Opiliaceae</b>                                                                                                 |                                                                                                                                     |
| <b>Orchidaceae</b> Juss.            | <b>Orchidaceae</b>                                                                                                |                                                                                                                                     |
|                                     | <b>Orobanchaceae</b>                                                                                              |                                                                                                                                     |
| Orobanchaceae Vent.                 | Scrophulariaceae: <i>Alectra, Brandisia, Centranthera, Lindendergia, Pedicularis, Rehmannia, Sotubia, Wightia</i> | Scrophulariaceae: <i>Alectra, Brandisia, Buchnera, Centranthera, Lindendergia, Pedicularis, Rehmannia, Sotubia, Striga, Wightia</i> |
| <b>Oxalidaceae</b> R. Br.           | <b>Oxalidaceae</b>                                                                                                |                                                                                                                                     |
| <b>Paeoniaceae</b> Raf.             | <b>Paeoniaceae</b>                                                                                                |                                                                                                                                     |
| <b>Pandanaceae</b> R. Br.,          | <b>Pandanaceae</b>                                                                                                |                                                                                                                                     |
|                                     | <b>Papaveraceae</b>                                                                                               |                                                                                                                                     |
| Papaveraceae Juss.                  | <b>Fumariaceae</b>                                                                                                |                                                                                                                                     |

|                                                |                                                                                                                                                                                                              |                                                                                                                                  |
|------------------------------------------------|--------------------------------------------------------------------------------------------------------------------------------------------------------------------------------------------------------------|----------------------------------------------------------------------------------------------------------------------------------|
| Passifloraceae Juss.<br>ex Roussel             | <b>Passifloraceae</b>                                                                                                                                                                                        |                                                                                                                                  |
|                                                | <b>Turneraceae</b>                                                                                                                                                                                           |                                                                                                                                  |
| Paulowniaceae Nakai                            | <b>Scrophulariaceae:</b> <i>Paulownia</i>                                                                                                                                                                    |                                                                                                                                  |
| <b>Pedaliaceae</b> R. Br.                      | <b>Pedaliaceae</b>                                                                                                                                                                                           |                                                                                                                                  |
| Pentaphragmataceae<br>J. Agardh                | <b>Campanulaceae:</b> <i>Pentaphragma</i>                                                                                                                                                                    |                                                                                                                                  |
| Pentaphylacaceae<br>Engl.                      | <b>Pentaphylacaceae</b>                                                                                                                                                                                      |                                                                                                                                  |
|                                                | Theaceae: <i>Adinandra, Anneslea, Eurya, Ternstroemia</i>                                                                                                                                                    | Theaceae: <i>Adinandra, Anneslea, Eurya</i>                                                                                      |
| Penthoraceae Rydb.<br>ex Britton               | Pittosporaceae: <i>Penthorum</i>                                                                                                                                                                             | Penthoraceae                                                                                                                     |
| Petrosaviaceae<br>Hutch.                       | Liliaceae: <i>Petrosavia</i>                                                                                                                                                                                 | Melanthiaceae: <i>Petrosavia</i>                                                                                                 |
| <b>Philydraceae</b> Link                       | <b>Philydraceae</b>                                                                                                                                                                                          |                                                                                                                                  |
| Phrymaceae Schauer                             | Scrophulariaceae: <i>Mimulus, Mazus, Microcarpaea</i>                                                                                                                                                        | Scrophulariaceae: <i>Mimulus, Microcarpaea, Glossotigma</i>                                                                      |
| Phyllanthaceae Martinov                        | <b>Euphorbiaceae:</b> <i>Aporosa, Actephila, Antidesma, Aporosa, Baccaurea, Bischofia, Breynia, Bridelia, Cleistanthus, Flueggea, Glochidion, Hymenocardia, Leptopus, Margaritara, Phyllanthus, Sauropus</i> |                                                                                                                                  |
| <b>Phytolaccaceae</b> R. Br.                   | <b>Phytolaccaceae</b>                                                                                                                                                                                        |                                                                                                                                  |
| Piperaceae Giseke                              | Piperaceae                                                                                                                                                                                                   | Piperaceae: excl. <i>Circaeocarpus</i>                                                                                           |
| Pittosporaceae R. Br.                          | Pittosporaceae: excl. <i>Penthorum</i>                                                                                                                                                                       | Pittosporaceae                                                                                                                   |
|                                                | <b>Plantaginaceae</b>                                                                                                                                                                                        |                                                                                                                                  |
| Plantaginaceae Juss.                           | Scrophulariaceae: <i>Angelonia</i>                                                                                                                                                                           | Scrophulariaceae: <i>Adenosma, Angelonia, Antirrhinum, Bacopa, Digitalis, Limnophila, Russelia, Scoparia, Stemodia, Veronica</i> |
|                                                | <b>Callitrichiaceae</b>                                                                                                                                                                                      |                                                                                                                                  |
| <b>Platanaceae</b> T. Lestib.                  | <b>Platanaceae</b>                                                                                                                                                                                           |                                                                                                                                  |
| <b>Plumbaginaceae</b><br>Juss.                 | <b>Plumbaginaceae</b>                                                                                                                                                                                        |                                                                                                                                  |
| <b>Poaceae</b> Barnhart                        | <b>Poaceae</b>                                                                                                                                                                                               |                                                                                                                                  |
| <b>Podostemaceae</b> Rich.<br>ex Kunth         | <b>Podostemaceae</b>                                                                                                                                                                                         |                                                                                                                                  |
| <b>Polemoniaceae</b> Juss.                     | <b>Polemoniaceae</b>                                                                                                                                                                                         |                                                                                                                                  |
| <b>Polygalaceae</b> Hoffmanns. & Link          | <b>Polygalaceae</b>                                                                                                                                                                                          |                                                                                                                                  |
| <b>Polygonaceae</b> Juss.                      | <b>Polygonaceae</b>                                                                                                                                                                                          |                                                                                                                                  |
| <b>Pontederidaceae</b><br>Kunth.               | <b>Pontederidaceae</b>                                                                                                                                                                                       |                                                                                                                                  |
| Portulacaceae Juss.                            | <b>Portulacaceae:</b> excl. <i>Talinum</i>                                                                                                                                                                   |                                                                                                                                  |
| <b>Potamogetonaceae</b><br>Bercht. & J. Presl. | <b>Potamogetonaceae</b>                                                                                                                                                                                      |                                                                                                                                  |
| Primulaceae Batsch<br>ex Borkh.                | <b>Myrsinaceae</b>                                                                                                                                                                                           |                                                                                                                                  |
|                                                | <b>Primulaceae</b>                                                                                                                                                                                           |                                                                                                                                  |
| <b>Proteaceae</b> Juss.                        | <b>Proteaceae</b>                                                                                                                                                                                            |                                                                                                                                  |
| Putranjivaceae Meisn.                          | <b>Euphorbiaceae:</b> <i>Drypetes</i>                                                                                                                                                                        |                                                                                                                                  |
| Rafflesiaceae Dumort.                          | <b>Rafflesiaceae:</b> <i>Sapria</i>                                                                                                                                                                          |                                                                                                                                  |

|                                           |                                                     |                                                      |
|-------------------------------------------|-----------------------------------------------------|------------------------------------------------------|
| <b>Ranunculaceae</b> Juss.                | <b>Ranunculaceae</b>                                |                                                      |
| Resedaceae Martinov                       | Capparaceae: <i>Neothorelia, Stixis, Tirania</i>    | Capparaceae: <i>Stixis, Tirania</i>                  |
| Restionaceae R. Br.                       | <b>Restionaceae</b>                                 |                                                      |
|                                           | <b>Centrolepidaceae</b>                             |                                                      |
| <b>Rhamnaceae</b> Juss.                   | <b>Rhamnaceae</b>                                   |                                                      |
| <b>Rhizophoraceae</b> Pers.               | <b>Rhizophoraceae</b>                               |                                                      |
| Rosaceae Juss.                            | Rosaceae: excl. <i>Chrysobalanus, Parinari</i>      | Rosaceae                                             |
| Rubiaceae Juss.                           | Rubiaceae: excl. <i>Carlemannia</i>                 |                                                      |
| <b>Ruppiaceae</b> Horan.                  | <b>Ruppiaceae</b>                                   |                                                      |
| Rutaceae Juss.                            | <b>Rutaceae</b>                                     |                                                      |
|                                           | <b>Simaroubaceae: Harrisonia</b>                    |                                                      |
| Sabiaceae Blume                           | Sabiaceae: excl. <i>Hugonia, Indoroucheria</i>      | Sabiaceae                                            |
| Salicaceae Mirb.                          | Flacourtiaceae: excl. <i>Hydnocarpus</i>            | Flacourtiaceae: excl. <i>Gynocardia, Hydnocarpus</i> |
|                                           | <b>Salicaceae</b>                                   |                                                      |
| <b>Salvadoraceae</b> Lindl                | <b>Salvadoraceae</b>                                |                                                      |
| Santalaceae R. Br.                        | <b>Santalaceae</b>                                  |                                                      |
|                                           | Loranthaceae: <i>Ginalloa, Korthalsella, Viscum</i> | Viscaceae                                            |
|                                           | <b>Aceraceae</b>                                    |                                                      |
| Sapindaceae Juss.                         | <b>Hippocastanaceae</b>                             |                                                      |
|                                           | <b>Sapindaceae</b>                                  |                                                      |
| <b>Sapotaceae</b> Juss.                   | <b>Sapotaceae</b>                                   |                                                      |
| <b>Saururaceae</b> Rich. ex<br>T. Lestib. | <b>Saururaceae</b>                                  |                                                      |
| Saxifragaceae Juss.                       | Saxifragaceae: excl. <i>Pilostigma</i>              | Saxifragaceae                                        |
| Schisandraceae<br>Blume                   | <b>Schisandraceae</b>                               |                                                      |
|                                           | <b>Illiciaceae</b>                                  |                                                      |
| Schoepfiaceae Blume                       | Olacaceae: <i>Schoepfia</i>                         | Schoepfiaceae                                        |
| Scrophulariaceae<br>Juss.                 | <b>Buddlejaceae</b>                                 |                                                      |
|                                           | <b>Myoporaceae</b>                                  |                                                      |
|                                           | <b>Scrophulariaceae: Scrophularia</b>               |                                                      |
| Simaroubaceae DC.                         | <b>Simaroubaceae: excl. Irvingia</b>                |                                                      |
| <b>Smilacaceae</b> Vent.                  | <b>Smilacaceae</b>                                  |                                                      |
| <b>Solanaceae</b> Juss.                   | <b>Solanaceae</b>                                   |                                                      |
| <b>Sphenocleaceae</b> T.<br>Baskerv.      | <b>Sphenocleaceae</b>                               |                                                      |
| <b>Stachyuraceae</b> J.<br>Agardh         | <b>Stachyuraceae</b>                                |                                                      |
| Staphyleaceae Marti-<br>nov.              | <b>Staphyleaceae: excl. Tapiscia</b>                |                                                      |
| <b>Stemonaceae</b> Caruel                 | <b>Stemonaceae</b>                                  |                                                      |
| Stemonuraceae Kare-<br>hed                | <b>Icacinaceae: Gomphandra</b>                      |                                                      |
| <b>Strelitziaceae</b> Hutch.              | <b>Strelitziaceae</b>                               |                                                      |
| <b>Stylidiaceae</b> R. Br.                | <b>Stylidiaceae</b>                                 |                                                      |
| <b>Styracaceae</b> DC. &<br>Spreng.       | <b>Styracaceae</b>                                  |                                                      |
| Surianaceae Arn.                          | not recognized                                      | Simaroubaceae: <i>Suriana</i>                        |
| <b>Symplocaceae</b> Desf.                 | <b>Symplocaceae</b>                                 |                                                      |
| Talinaceae Doweld                         | <b>Portulacaceae: Talinum</b>                       |                                                      |

|                                   |                                                                                                               |                                                                   |
|-----------------------------------|---------------------------------------------------------------------------------------------------------------|-------------------------------------------------------------------|
| <b>Tamaricaceae</b> Link          | <b>Tamaricaceae</b>                                                                                           |                                                                   |
| Tapisciaceae Takht.               | <b>Staphyleaceae:</b> <i>Tapiscia</i>                                                                         |                                                                   |
| Theaceae Mirb.                    | Theaceae: excl. <i>Adinandra</i> , <i>Anneslea</i> , <i>Eurya</i> ,<br><i>Temstroemia</i>                     | Theaceae: excl. <i>Adinandra</i> , <i>Anneslea</i> , <i>Eurya</i> |
| <b>Thymelaeaceae</b> Juss.        | <b>Thymelaeaceae</b>                                                                                          |                                                                   |
| Toricelliaceae Hu                 | Cornaceae: <i>Toricellia</i>                                                                                  | Toricelliaceae                                                    |
| <b>Triuridaceae</b> Gardner       | <b>Triuridaceae</b>                                                                                           |                                                                   |
| <b>Tropaeolaceae</b> Juss. ex DC. | <b>Tropaeolaceae</b>                                                                                          |                                                                   |
| Typhaceae Juss.                   | <b>Sparganiaceae</b>                                                                                          |                                                                   |
|                                   | <b>Typhaceae</b>                                                                                              |                                                                   |
| Ulmaceae Mirb.                    | <b>Ulmaceae:</b> <i>Ulmus</i>                                                                                 |                                                                   |
| <b>Urticaceae</b> Juss.           | <b>Urticaceae</b>                                                                                             |                                                                   |
| Verbenaceae J. St. Hil.           | <b>Verbenaceae:</b> <i>Duranta</i> , <i>Lantana</i> , <i>Phyla</i> ,<br><i>Stachtarpheta</i> , <i>Verbena</i> |                                                                   |
| <b>Violaceae</b> Batsch           | <b>Violaceae</b>                                                                                              |                                                                   |
| Vitaceae Juss.                    | <b>Vitaceae</b>                                                                                               |                                                                   |
|                                   | <b>Leeaceae</b>                                                                                               |                                                                   |
| <b>Xyridaceae</b> C. Agardh       | <b>Xyridaceae</b>                                                                                             |                                                                   |
| Costaceae Nakai                   | Zingiberaceae: <i>Costus</i>                                                                                  | Costaceae: <i>Costus</i>                                          |
| Zingiberaceae Martinov            | Zingiberaceae: excl. <i>Costus</i>                                                                            | Zingiberaceae                                                     |
| Zosteraceae Dumort.               | not recognized                                                                                                | Zosteraceae                                                       |
| <b>Zygophyllaceae</b> R. Br.      | <b>Zygophyllaceae</b>                                                                                         |                                                                   |

**Table S7.** Classification of angiosperm families in Vietnam according to the APG IV classifications. (Families in **boldface** in IFV and CPSV have the same delimitation; Families in **boldface** in APG IV have the same delimitation as IFV and CPSV).

| APG IV families                                              | IFV (1999-2003)                                                     | CPSV (2001-2005)                       |
|--------------------------------------------------------------|---------------------------------------------------------------------|----------------------------------------|
| <b>BASAL ANGIOSPERMS</b>                                     |                                                                     |                                        |
| <b>Nymphaeales</b> Salisb. ex Bercht. & J. Presl             |                                                                     |                                        |
| 1 [3]. <b>Cabombaceae</b> Rich ex A. Rich.                   | as APG IV                                                           | as APG IV                              |
| 2 [4]. <b>Nymphaeaceae</b> Salisb.                           | <b>Nymphaeaceae</b><br><b>Barclayaceae</b>                          | as IFV<br>as IFV                       |
| <b>Austrobaileyales</b> Takht. ex Reveal                     |                                                                     |                                        |
| 3 [7]. <b>Schisandraceae</b> Blume                           | <b>Schisandraceae</b><br><b>Illiciaceae</b>                         | as IFV<br>as IFV                       |
| <b>MAGNOLIIDS</b>                                            |                                                                     |                                        |
| <b>Piperales</b> Bercht. & J. Presl                          |                                                                     |                                        |
| 4 [10]. <b>Saururaceae</b> Rich. ex T. Lestib.               | as APG IV                                                           | as APG IV                              |
| 5 [12]. <b>Piperaceae</b> Giseke                             | Piperaceae                                                          | Piperaceae: excl. <i>Circaeocarpus</i> |
| 6 [12]. <b>Aristolochiaceae</b> Juss.                        | as APG IV                                                           | as APG IV                              |
| <b>Magnoliales</b> Juss. ex Bercht. & J. Presl               |                                                                     |                                        |
| 7 [113]. <b>Myristicaceae</b> R. Br.                         | as APG IV                                                           | as APG IV                              |
| 8 [14]. <b>Magnoliaceae</b> Juss.                            | as APG IV                                                           | as APG IV                              |
| 9 [18]. <b>Annonaceae</b> Juss.                              | as APG IV                                                           | as APG IV                              |
| <b>Laurales</b> Juss. ex Bercht. & J. Presl                  |                                                                     |                                        |
| 10 [19]. <b>Calycanthaceae</b> Lindl.                        | not recognized                                                      | <b>Calycanthaceae</b>                  |
| 11 [23]. <b>Hernandiaceae</b> Blume                          | as APG IV                                                           | as APG IV                              |
| 12 [24]. <b>Monimiaceae</b> Juss.                            | as APG IV                                                           | as APG IV                              |
| 13 [25]. <b>Lauraceae</b> Juss.                              | as APG IV                                                           | as APG IV                              |
| <b>INDEPENDENT LINEAGE: UNPLACED TO MORE INCLUSIVE CLADE</b> |                                                                     |                                        |
| <b>Chloranthales</b> Mart.                                   |                                                                     |                                        |
| 14 [26]. <b>Chloranthaceae</b> R. Br. ex Sims                | as APG IV                                                           | as APG IV                              |
| <b>MONOCOTS</b>                                              |                                                                     |                                        |
| <b>Acorales</b> Mart.                                        |                                                                     |                                        |
| 15 [27]. <b>Acoraceae</b> Martinov                           | <b>Araceae: Acorus</b>                                              | as APG IV                              |
| <b>Alismatales</b> R. Br. ex Bercht. & J. Presl              |                                                                     |                                        |
| 16 [28]. <b>Araceae</b> Juss.                                | <b>Araceae: excl. Acorus</b>                                        | as APG IV                              |
| 17 [30]. <b>Alismataceae</b> Vent.                           | <b>Alismataceae</b><br><b>Butomaceae: Tenagocharis, Limnocharis</b> | as IFV                                 |
| 18 [32]. <b>Hydrocharitaceae</b> Juss.                       | <b>Hydrocharitaceae</b><br><b>Najadaceae</b>                        | as IFV<br>as IFV                       |
| 19 [34]. <b>Aponogetonaceae</b> Planch.                      | as APG IV                                                           | as APG IV                              |
| 20 [37]. <b>Zosteraceae</b> Dumort.                          | not recognized                                                      | as APG IV                              |
| 21 [38]. <b>Potamogetonaceae</b> Bercht. & J. Presl.         | as APG IV                                                           | as APG IV                              |
| 22 [40]. <b>Ruppiaceae</b> Horan.                            | as APG IV                                                           | as APG IV                              |
| 23 [41]. <b>Cymodoceaceae</b> Vines                          | <b>Zannichelliaceae</b>                                             | <b>Cymodoceaceae</b>                   |
| <b>Petrosaviales</b> Hutch.                                  |                                                                     |                                        |
| 24 [42]. <b>Petrosaviaceae</b> Hutch.                        | <b>Liliaceae: Petrosavia</b>                                        | <b>Melanthiaceae: Petrosavia</b>       |
| <b>Dioscoreales</b> Mart.                                    |                                                                     |                                        |
| 25 [44]. <b>Burmanniaceae</b> Blume                          | as APG IV                                                           | as APG IV                              |
| 26 [45]. <b>Dioscoreaceae</b> R. Br.                         | <b>Dioscoreaceae</b>                                                | as APG IV                              |

|                                                |                                                                                         |                                                                             |
|------------------------------------------------|-----------------------------------------------------------------------------------------|-----------------------------------------------------------------------------|
|                                                | <b>Taccaceae</b>                                                                        | as APG IV                                                                   |
| <b>Pandanales</b> R. Br. ex Bercht. & J. Presl |                                                                                         |                                                                             |
| 27 [46]. <b>Triuridaceae</b> Gardner           | as APG IV                                                                               | as APG IV                                                                   |
| 28 [48]. <b>Stemonaceae</b> Caruel             | as APG IV                                                                               | as APG IV                                                                   |
| 29 [50]. <b>Pandanaceae</b> R. Br.             | as APG IV                                                                               | as APG IV                                                                   |
| <b>Liliales</b> Perleb                         |                                                                                         |                                                                             |
| 30 [53]. Melanthiaceae Batsch ex Borkh.        | Liliaceae: <i>Paris</i>                                                                 | Trilliaceae                                                                 |
| 31 [56]. Colchicaceae DC.                      | Liliaceae: <i>Gloriosa, Iphigenia</i>                                                   | Melanthiaceae: <i>Gloriosa, Iphigenia</i>                                   |
|                                                | Liliaceae: <i>Disporum</i>                                                              | Convallariaceae: <i>Disporum</i>                                            |
| 32 [59]. <b>Smilacaceae</b> Vent.              | as APG IV                                                                               | as APG IV                                                                   |
| 34 [60]. Liliaceae Juss.                       | Liliaceae: <i>Lilium</i>                                                                | Liliaceae                                                                   |
| <b>Asparagales</b> Link                        |                                                                                         |                                                                             |
| 35 [61]. <b>Orchidaceae</b> Juss.              | as APG IV                                                                               | as APG IV                                                                   |
| 36 [64]. Asteliaceae Dumort.                   | not recognized                                                                          | Asteliaceae                                                                 |
| 37 [66]. Hypoxidaceae R. Br.                   | Amaryllidaceae: <i>Curculigo, Hypoxis</i>                                               | Hypoxidaceae                                                                |
| 38 [70]. <b>Iridaceae</b> Juss.                | as APG IV                                                                               | as APG IV                                                                   |
| 39 [72]. Asphodelaceae Juss.                   | Liliaceae: <i>Aloe</i>                                                                  | Asphodelaceae                                                               |
|                                                | Liliaceae: <i>Dianella</i>                                                              | Phormiaceae                                                                 |
|                                                | Liliaceae: <i>Hemerocallis</i>                                                          | Hemerocallidaceae                                                           |
| 40 [73]. Amaryllidaceae J. St.-Hil.            | Amaryllidaceae: <i>Agapanthus, Crinum, Lycoris, Narcissus, Pancratium, Zephyranthes</i> | Amaryllidaceae: <i>Crinum, Lycoris, Narcissus, Pancratium, Zephyranthes</i> |
|                                                | Liliaceae: <i>Allium</i>                                                                | Alliaceae                                                                   |
| 41. [74]. Asparagaceae Juss.                   | <b>Agavaceae:</b> <i>Agave</i>                                                          | Asparagaceae                                                                |
|                                                | Liliaceae: <i>Asparagus</i>                                                             | Convallariaceae: excl. <i>Disporum</i>                                      |
|                                                | Liliaceae: <i>Aspidistra, Disporopsis, Disporum, Polygonatum, Tupistra</i>              |                                                                             |
|                                                | Agavaceae: <i>Dracaena, Sansevieria</i>                                                 | Dracaenaceae                                                                |
|                                                | Agavaceae: <i>Urginea</i>                                                               | Hyacinthaceae                                                               |
|                                                | Agavaceae: <i>Nolina</i>                                                                | Nolinaceae: <i>Nolina</i>                                                   |
| <b>Arecales</b> Bromhead                       |                                                                                         |                                                                             |
| 42 [76]. <b>Arecaceae</b> Bercht. & J. Presl   | as APG IV                                                                               | as APG IV                                                                   |
| <b>Commelinales</b> Mirb. ex Bercht. J. Presl  |                                                                                         |                                                                             |
| 43 [77]. <b>Hanguanaceae</b> Airy Shaw         | as APG IV                                                                               | as APG IV                                                                   |
| 44 [78]. <b>Commelinaceae</b> Mirb.            | as APG IV                                                                               | as APG IV                                                                   |
| 45 [79]. <b>Philydraceae</b> Link              | as APG IV                                                                               | as APG IV                                                                   |
| 46 [80]. <b>Pontederidaceae</b> Kunth.         | as APG IV                                                                               | as APG IV                                                                   |
| <b>Zingiberales</b> Griseb.                    |                                                                                         |                                                                             |
| 47 [82]. <b>Strelitziaceae</b> Hutch.          | as APG IV                                                                               | as APG IV                                                                   |
| 48 [83]. <b>Lowiaceae</b> Ridl.                | as APG IV                                                                               | as APG IV                                                                   |
| 49 [84]. <b>Heliconiaceae</b> Vines            | as APG IV                                                                               | as APG IV                                                                   |
| 50 [85]. <b>Musaceae</b> Juss.                 | as APG IV                                                                               | as APG IV                                                                   |
| 51 [86]. <b>Cannaceae</b> Juss.                | as APG IV                                                                               | as APG IV                                                                   |
| 52 [87]. <b>Marantaceae</b> R. Br.             | as APG IV                                                                               | as APG IV                                                                   |
| 53 [88]. Costaceae Nakai                       | Zingiberaceae: <i>Costus</i>                                                            | Costaceae: <i>Costus</i>                                                    |

|                                                     |                                                                    |               |
|-----------------------------------------------------|--------------------------------------------------------------------|---------------|
| 54 [89]. Zingiberaceae Martinov                     | Zingiberaceae: excl.<br><i>Costus</i>                              | Zingiberaceae |
| <b>Poales Small</b>                                 |                                                                    |               |
| 55 [90]. Typhaceae Juss.                            | <b>Sparganiaceae</b>                                               | as IFV        |
|                                                     | <b>Typhaceae</b>                                                   | as IFV        |
| 56 [91]. <b>Bromeliaceae</b> Juss.                  | as APG IV                                                          | as APG IV     |
| 57 [93]. <b>Xyridaceae</b> C. Agardh                | as APG IV                                                          | as APG IV     |
| 58 [94]. <b>Eriocaulaceae</b> Martinov              | as APG IV                                                          | as APG IV     |
| 59 [97]. <b>Juncaceae</b> Juss.                     | as APG IV                                                          | as APG IV     |
| 60 [98]. <b>Cyperaceae</b> Juss.                    | as APG IV                                                          | as APG IV     |
| 61 [99]. Restionaceae R. Br.                        | <b>Restionaceae</b>                                                | as IFV        |
|                                                     | <b>Centrolepidaceae</b>                                            | as IFV        |
| 62 [100]. <b>Flagellariaceae</b> Dumort.            | as APG IV                                                          | as APG IV     |
| 63 [103]. <b>Poaceae</b> Barnhart                   | as APG IV                                                          | as APG IV     |
| <b>PROBABLE SISTER OF EUDICOTS</b>                  |                                                                    |               |
| <b>Ceratophyllales Link</b>                         |                                                                    |               |
| 64 [104]. <b>Ceratophyllaceae</b> Gray              | as APG IV                                                          | as APG IV     |
| <b>EUDICOTS</b>                                     |                                                                    |               |
| <b>Ranunculales Juss. ex Bercht. &amp; J. Presl</b> |                                                                    |               |
| 65 [106]. Papaveraceae Juss.                        | <b>Papaveraceae</b>                                                | as IFV        |
|                                                     | <b>Fumariaceae</b>                                                 | as IFV        |
| 66 [108]. Lardizabalaceae R. Br.                    | <b>Lardizabalaceae</b>                                             | as IFV        |
|                                                     | <b>Sargentodoxaceae</b>                                            | as IFV        |
| 67 [109]. <b>Menispermaceae</b> Juss.               | as APG IV                                                          | as APG IV     |
| 68 [110]. <b>Berberidaceae</b> Juss.                | as APG IV                                                          | as APG IV     |
| 69 [111]. <b>Ranunculaceae</b> Juss.                | as APG IV                                                          | as APG IV     |
| <b>Proteales Juss. ex Bercht. &amp; J. Presl</b>    |                                                                    |               |
| 70 [112]. Sabiaceae Blume                           | Sabiaceae: excl. <i>Hu-</i><br><i>gonia</i> , <i>Indoroucheria</i> | as APG IV     |
| 71 [113]. <b>Nelumbonaceae</b> A. Rich.             | as APG IV                                                          | as APG IV     |
| 72 [114]. <b>Platanaceae</b> T. Lestib.             | as APG IV                                                          | as APG IV     |
| 73 [115]. <b>Proteaceae</b> Juss.                   | as APG IV                                                          | as APG IV     |
| <b>Buxales Takht. ex Reveal</b>                     |                                                                    |               |
| 74 [117]. <b>Buxaceae</b> Dumort.                   | as APG IV                                                          | as APG IV     |
| <b>CORE EUDICOTS</b>                                |                                                                    |               |
| <b>#Dilleniales DC. ex Bercht. &amp; J. Presl</b>   |                                                                    |               |
| 75 [120]. <b>Dilleniaceae</b> Salisb.               | as APG IV                                                          | as APG IV     |
| <b>SUPERROSIDS</b>                                  |                                                                    |               |
| <b>Saxifragales Bercht. &amp; J. Presl.</b>         |                                                                    |               |
| 76 [122]. <b>Paeoniaceae</b> Raf.                   | as APG IV                                                          | as APG IV     |
| 77 [123]. <b>Altingiaceae</b> Lindl.                | as APG IV                                                          | as APG IV     |
| 78 [124]. <b>Hamamelidaceae</b> R. Br.              | as APG IV                                                          | as APG IV     |
| 79 [127]. Iteaceae J. Agardh                        | Saxifragaceae: <i>Itea</i>                                         | Iteaceae      |
| 80 [129]. Saxifragaceae Juss.                       | Saxifragaceae: excl. <i>Pi-</i><br><i>lostigma</i>                 | Saxifragaceae |
| 81 [130]. <b>Crassulaceae</b> J.St.-Hil.            | as APG IV                                                          | as APG IV     |
| 82 [133]. Penthoraceae Rydb. ex Britton             | Pittosporaceae: <i>Pentho-</i><br><i>rum</i>                       | Penthoraceae  |
| 83 [134]. <b>Haloragaceae</b> R. Br.                | as APG IV                                                          | as APG IV     |



|                                                 |                                                                    |                                                              |
|-------------------------------------------------|--------------------------------------------------------------------|--------------------------------------------------------------|
| <b>ROSIDS</b>                                   |                                                                    |                                                              |
| <b>Vitales</b> Juss. ex Bercht. & J. Presl      |                                                                    |                                                              |
| 84 [136]. Vitaceae Juss.                        | <b>Vitaceae</b><br><b>Leeaceae</b>                                 | as IFV<br>as IFV                                             |
| <b>Zygophyllales</b> Link                       |                                                                    |                                                              |
| 85 [138]. <b>Zygophyllaceae</b> R. Br.          | as APG IV                                                          | as APG IV                                                    |
| <b>Fabales</b> Bromhead                         |                                                                    |                                                              |
| 86 [140]. Fabaceae Lindl.                       | <b>Cesalpiniaceae</b><br><b>Mimosaceae</b>                         | as APG IV                                                    |
| 87 [141]. Surianaceae Arn.                      | not recognized                                                     | Simaroubaceae: <i>Suriana</i>                                |
| 88 [142]. <b>Polygalaceae</b> Hoffmanns. & Link | as APG IV                                                          | as APG IV                                                    |
| <b>Rosales</b> Bercht. & J. Presl               |                                                                    |                                                              |
| 89 [143]. Rosaceae Juss.                        | Rosaceae: excl. <i>Chryso-</i><br><i>balanus</i> , <i>Parinari</i> | as APG IV                                                    |
| 90 [146]. <b>Elaeagnaceae</b> Juss.             | as APG IV                                                          | as APG IV                                                    |
| 91 [147]. <b>Rhamnaceae</b> Juss.               | as APG IV                                                          | as APG IV                                                    |
| 92 [148]. Ulmaceae Mirb.                        | <b>Ulmaceae</b> : <i>Ulmus</i>                                     | as APG IV                                                    |
| 93 [149]. <b>Cannabaceae</b> Martinov.          | as APG IV                                                          | as APG IV                                                    |
| 94 [150]. <b>Moraceae</b> Gaudich.              | as APG IV                                                          | as APG IV                                                    |
| 95 [151]. <b>Urticaceae</b> Juss.               | as APG IV                                                          | as APG IV                                                    |
| <b>Fagales</b> Engl.                            |                                                                    |                                                              |
| 96 [153]. <b>Fagaceae</b> Dumort.               | as APG IV                                                          | as APG IV                                                    |
| 97 [154]. <b>Myricaceae</b> Rich. ex Kunth      | as APG IV                                                          | as APG IV                                                    |
| 98 [155]. Juglandaceae DC. Ex Perleb            | <b>Juglandaceae</b><br><b>Rhoipteleaceae</b>                       | as IFV<br>as IFV                                             |
| 99 [156]. <b>Casuarinaceae</b> R. Br.           | as APG IV                                                          | as APG IV                                                    |
| 100 [158]. <b>Betulaceae</b> Gray               | as APG IV                                                          | as APG IV                                                    |
| <b>Cucurbitales</b> Juss. ex Bercht. & J. Presl |                                                                    |                                                              |
| 101 [160]. <b>Anisophylleaceae</b> Ridl.        | as APG IV                                                          | as APG IV                                                    |
| 102 [163]. <b>Cucurbitaceae</b> Juss.           | as APG IV                                                          | as APG IV                                                    |
| 103 [165]. <b>Datiscaceae</b> Dumort.           | as APG IV                                                          | as APG IV                                                    |
| 104 [166]. <b>Begoniaceae</b> C. Agardh         | as APG IV                                                          | as APG IV                                                    |
| <b>[COM-clade; placement uncertain]</b>         |                                                                    |                                                              |
| <b>Celastrales</b> Link                         |                                                                    |                                                              |
| 105 [168]. Celastraceae R. Br.                  | <b>Celastraceae</b><br>not recognized                              | as IFV<br>Siphonodontataceae                                 |
| <b>Oxalidales</b> Bercht. & J. Presl            |                                                                    |                                                              |
| 106 [170]. <b>Connaraceae</b> R. Br.            | as APG IV                                                          | as APG IV                                                    |
| 107 [171]. <b>Oxalidaceae</b> R. Br.            | as APG IV                                                          | as APG IV                                                    |
| 108 [173]. <b>Elaeocarpaceae</b> Juss.          | as APG IV                                                          | as APG IV                                                    |
| <b>Malpighiales</b> Juss. ex Bercht. & J. Presl |                                                                    |                                                              |
| 109 [179]. <b>Rhizophoraceae</b> Pers.          | as APG IV                                                          | as APG IV                                                    |
| 110 [180]. <b>Erythroxylaceae</b> Kunth         | as APG IV                                                          | as APG IV                                                    |
| 111 [181]. <b>Ochnaceae</b> DC.                 | as APG IV                                                          | as APG IV                                                    |
| 112 [182]. Bonnetiaceae L. Beauvis. ex Nakai    | not recognized                                                     | as APG IV                                                    |
| 113 [183]. Clusiaceae Lindl.                    | <b>Clusiaceae</b> : <i>Garcinia</i>                                | as APG IV                                                    |
| 114 [184]. Calophyllaceae J. Agardh             | Clusiaceae: <i>Calophyllym</i> ,<br><i>Mesua</i>                   | Clusiaceae: <i>Calophyllym</i> , <i>Mesua</i> , <i>Kayea</i> |

|                                                 |                                                                                                                                                                                                                                                                                                                                                                                                                                                                                                                                                                                                                                                                                                                                                                                                                          |                                                                                                                                                                                                                                                                                                                                                                                                                                                                                                                                                                                                                                                                                                                                                                                                                                                                    |
|-------------------------------------------------|--------------------------------------------------------------------------------------------------------------------------------------------------------------------------------------------------------------------------------------------------------------------------------------------------------------------------------------------------------------------------------------------------------------------------------------------------------------------------------------------------------------------------------------------------------------------------------------------------------------------------------------------------------------------------------------------------------------------------------------------------------------------------------------------------------------------------|--------------------------------------------------------------------------------------------------------------------------------------------------------------------------------------------------------------------------------------------------------------------------------------------------------------------------------------------------------------------------------------------------------------------------------------------------------------------------------------------------------------------------------------------------------------------------------------------------------------------------------------------------------------------------------------------------------------------------------------------------------------------------------------------------------------------------------------------------------------------|
| 115 [185]. <b>Podostemaceae</b> Rich. ex Kunth  | as APG IV                                                                                                                                                                                                                                                                                                                                                                                                                                                                                                                                                                                                                                                                                                                                                                                                                | as APG IV                                                                                                                                                                                                                                                                                                                                                                                                                                                                                                                                                                                                                                                                                                                                                                                                                                                          |
| 116 [186]. Hypericaceae Juss.                   | Clusiaceae: <i>Cratoxylum</i> ,<br><i>Hypericum</i>                                                                                                                                                                                                                                                                                                                                                                                                                                                                                                                                                                                                                                                                                                                                                                      | as APG IV                                                                                                                                                                                                                                                                                                                                                                                                                                                                                                                                                                                                                                                                                                                                                                                                                                                          |
| 117 [189]. Putranjivaceae Meisn.                | <b>Euphorbiaceae</b> : <i>Drypetes</i>                                                                                                                                                                                                                                                                                                                                                                                                                                                                                                                                                                                                                                                                                                                                                                                   | as APG IV                                                                                                                                                                                                                                                                                                                                                                                                                                                                                                                                                                                                                                                                                                                                                                                                                                                          |
| 118 [191]. <b>Elatinaceae</b> Dumort.           | as APG IV                                                                                                                                                                                                                                                                                                                                                                                                                                                                                                                                                                                                                                                                                                                                                                                                                | as APG IV                                                                                                                                                                                                                                                                                                                                                                                                                                                                                                                                                                                                                                                                                                                                                                                                                                                          |
| 119 [192]. <b>Malpighiaceae</b> Juss.           | as APG IV                                                                                                                                                                                                                                                                                                                                                                                                                                                                                                                                                                                                                                                                                                                                                                                                                | as APG IV                                                                                                                                                                                                                                                                                                                                                                                                                                                                                                                                                                                                                                                                                                                                                                                                                                                          |
| 120 [195]. <b>Dichapetalaceae</b> Baill.        | as APG IV                                                                                                                                                                                                                                                                                                                                                                                                                                                                                                                                                                                                                                                                                                                                                                                                                | as APG IV                                                                                                                                                                                                                                                                                                                                                                                                                                                                                                                                                                                                                                                                                                                                                                                                                                                          |
| 121 [197]. Chrysobalanaceae R. Br.              | Rosaceae: <i>Chrysobalanus</i> , <i>Parinari</i>                                                                                                                                                                                                                                                                                                                                                                                                                                                                                                                                                                                                                                                                                                                                                                         | as APG IV                                                                                                                                                                                                                                                                                                                                                                                                                                                                                                                                                                                                                                                                                                                                                                                                                                                          |
| 122 [199]. Achariaceae Harms                    | Flacourtiaceae: <i>Hydnocarpus</i>                                                                                                                                                                                                                                                                                                                                                                                                                                                                                                                                                                                                                                                                                                                                                                                       | Flacourtiaceae: <i>Gynocardia</i> , <i>Hydnocarpus</i>                                                                                                                                                                                                                                                                                                                                                                                                                                                                                                                                                                                                                                                                                                                                                                                                             |
| 123 [200]. <b>Violaceae</b> Batsch              | as APG IV                                                                                                                                                                                                                                                                                                                                                                                                                                                                                                                                                                                                                                                                                                                                                                                                                | as APG IV                                                                                                                                                                                                                                                                                                                                                                                                                                                                                                                                                                                                                                                                                                                                                                                                                                                          |
| 124 [202]. Passifloraceae Juss. ex Roussel      | <b>Passifloraceae</b><br><b>Turneraceae</b>                                                                                                                                                                                                                                                                                                                                                                                                                                                                                                                                                                                                                                                                                                                                                                              | as IFV<br>as IFV                                                                                                                                                                                                                                                                                                                                                                                                                                                                                                                                                                                                                                                                                                                                                                                                                                                   |
| 125 [204]. Salicaceae Mirb.                     | Flacourtiaceae: excl. <i>Hydnocarpus</i><br><b>Salicaceae</b>                                                                                                                                                                                                                                                                                                                                                                                                                                                                                                                                                                                                                                                                                                                                                            | Flacourtiaceae: excl. <i>Gynocardia</i> , <i>Hydnocarpus</i><br>as IFV                                                                                                                                                                                                                                                                                                                                                                                                                                                                                                                                                                                                                                                                                                                                                                                             |
| 126 [206]. Rafflesiaceae Dumort.                | <b>Rafflesiaceae</b> : <i>Sapria</i>                                                                                                                                                                                                                                                                                                                                                                                                                                                                                                                                                                                                                                                                                                                                                                                     | as APG IV                                                                                                                                                                                                                                                                                                                                                                                                                                                                                                                                                                                                                                                                                                                                                                                                                                                          |
| 127 [207]. Euphorbiaceae Juss.                  | Euphorbiaceae: <i>Acalypha</i> , <i>Alchornea</i> , <i>Aleurites</i> , <i>Baliospermum</i> , <i>Blachia</i> , <i>Chaetocarpus</i> , <i>Cladogynos</i> , <i>Claoxylon</i> , <i>Cleidio-carpon</i> , <i>Cleidion</i> , <i>Cnesmone</i> , <i>Codiaeum</i> , <i>Croton</i> , <i>Dalechampia</i> , <i>Duetzianthus</i> , <i>Dimorphocalyx</i> , <i>Endospermum</i> , <i>Epiperinus</i> , <i>Erismanthus</i> , <i>Euphorbia</i> , <i>Excoecaria</i> , <i>Hevea</i> , <i>Homonoia</i> , <i>Hura</i> , <i>Jatropha</i> , <i>Lasiococca</i> , <i>Macaranga</i> , <i>Mallotus</i> , <i>Manihot</i> , <i>Melanolepis</i> , <i>Ostodes</i> , <i>Pachystylidium</i> , <i>Pedilanthus</i> , <i>Ricinus</i> , <i>Strophoblachia</i> , <i>Sumbaviopsis</i> , <i>Suregada</i> , <i>Trevisa</i> , <i>Trigonostemon</i> , <i>Vernicia</i> . | Euphorbiaceae: <i>Acalypha</i> , <i>Alchornea</i> , <i>Aleurites</i> , <i>Baliospermum</i> , <i>Blachia</i> , <i>Chaetocarpus</i> , <i>Cladogynos</i> , <i>Claoxylon</i> , <i>Cleidio-carpon</i> , <i>Cleidion</i> , <i>Cnesmone</i> , <i>Codiaeum</i> , <i>Croton</i> , <i>Dalechampia</i> , <i>Duetzianthus</i> , <i>Dimorphocalyx</i> , <i>Endospermum</i> , <i>Epiperinus</i> , <i>Erismanthus</i> , <i>Euphorbia</i> , <i>Excoecaria</i> , <i>Hevea</i> , <i>Homonoia</i> , <i>Hura</i> , <i>Jatropha</i> , <i>Koilo-depas</i> , <i>Lasiococca</i> , <i>Macaranga</i> , <i>Mallotus</i> , <i>Manihot</i> , <i>Melanolepis</i> , <i>Mercurialis</i> , <i>Ostodes</i> , <i>Pachystylidium</i> , <i>Pedilanthus</i> , <i>Ricinus</i> , <i>Strophoblachia</i> , <i>Sumbaviopsis</i> , <i>Suregada</i> , <i>Trevisa</i> , <i>Trigonostemon</i> , <i>Vernicia</i> . |
| 128 [208]. Linaceae DC. ex Perleb.              | <b>Linaceae</b><br>Sabiaceae: <i>Hugonia</i> , <i>Indoroucheria</i>                                                                                                                                                                                                                                                                                                                                                                                                                                                                                                                                                                                                                                                                                                                                                      | as IFV<br>Hugoniaceae                                                                                                                                                                                                                                                                                                                                                                                                                                                                                                                                                                                                                                                                                                                                                                                                                                              |
| 129 [209]. <b>Ixonanthaceae</b> Planch. ex Miq. | as APG IV                                                                                                                                                                                                                                                                                                                                                                                                                                                                                                                                                                                                                                                                                                                                                                                                                | as APG IV                                                                                                                                                                                                                                                                                                                                                                                                                                                                                                                                                                                                                                                                                                                                                                                                                                                          |
| 130 [211]. Phyllanthaceae Martinov              | <b>Euphorbiaceae</b> : <i>Aporosa</i> , <i>Actephila</i> , <i>Antidesma</i> , <i>Aporosa</i> , <i>Baccaurea</i> , <i>Bischofia</i> , <i>Breynia</i> , <i>Bridelia</i> , <i>Cleistanthus</i> , <i>Flueggea</i> , <i>Glochidion</i> ,                                                                                                                                                                                                                                                                                                                                                                                                                                                                                                                                                                                      | as IFV                                                                                                                                                                                                                                                                                                                                                                                                                                                                                                                                                                                                                                                                                                                                                                                                                                                             |

|                                                                    |                                                  |                                          |
|--------------------------------------------------------------------|--------------------------------------------------|------------------------------------------|
| <i>Hymenocardia, Leptopus, Margaritaria, Phyllanthus, Sauropus</i> |                                                  |                                          |
| <b>Geraniales</b> Juss. ex Bercht. & J. Presl                      |                                                  |                                          |
| 131 [212]. <b>Geraniaceae</b> Juss.                                | as APG IV                                        | as APG IV                                |
| <b>Myrtales</b> Juss. ex Bercht. & J. Presl                        |                                                  |                                          |
| 132 [214]. <b>Combretaceae</b> R. Br.                              | as APG IV                                        | as APG IV                                |
| 133 [215]. Lythraceae J. St.-Hil.                                  | <b>Lythraceae</b>                                | as IFV                                   |
|                                                                    | <b>Punicaceae</b>                                | as IFV                                   |
|                                                                    | <b>Sonneratiaceae</b>                            | as IFV                                   |
|                                                                    | <b>Trapaceae</b>                                 | as IFV                                   |
| 134 [218]. <b>Myrtaceae</b> Juss.                                  | as APG IV                                        | as APG IV                                |
| 135 [219]. <b>Melastomataceae</b> Juss.                            | as APG IV                                        | as APG IV                                |
| 136 [220]. <b>Crypteroniaceae</b> A. DC.                           | as APG IV                                        | as APG IV                                |
| <b>Crossosomatales</b> Takht. ex Reveal                            |                                                  |                                          |
| 137 [226]. Staphyleaceae Martinov.                                 | <b>Staphyleaceae:</b> excl. <i>Tapiscia</i>      | as IFV                                   |
| 138 [228]. <b>Stachyuraceae</b> J. Agardh                          | as APG IV                                        | as APG IV                                |
| <b>Huerteales</b> Doweld                                           |                                                  |                                          |
| 139 [233]. Tapisciaceae Takht.                                     | <b>Staphyleaceae:</b> <i>Tapiscia</i>            | as IFV                                   |
| 140 [234]. Dipentodontaceae Merr.                                  | not recognized                                   | Dipentodontaceae                         |
| <b>Sapindales</b> Juss. ex Bercht. & J. Presl                      |                                                  |                                          |
| 141 [238]. Burseraceae Kunth                                       | Burseraceae                                      | Anacardiaceae: <i>Bursera, Canarium,</i> |
| 142 [239]. Anacardiaceae R. Br.                                    | Anacardiaceae                                    | <i>Dacryodes, Garuga, Protium</i>        |
| 143 [240]. Sapindaceae Juss.                                       | <b>Aceraceae</b>                                 | as IFV                                   |
|                                                                    | <b>Hippocastanaceae</b>                          | as IFV                                   |
|                                                                    | <b>Sapindaceae</b>                               | as IFV                                   |
| 144 [241]. Rutaceae Juss.                                          | <b>Rutaceae</b>                                  | as IFV                                   |
|                                                                    | <b>Simaroubaceae:</b> <i>Harri-sonia</i>         | as IFV                                   |
| 145 [242]. Simaroubaceae DC.                                       | Simaroubaceae: excl. <i>Irvingia</i>             | Simaroubaceae: excl. <i>Suriana</i>      |
| 146 [243]. <b>Meliaceae</b> Juss.                                  | as APG IV                                        | as APG IV                                |
| <b>Malvales</b> Juss. ex Bercht. & J. Presl                        |                                                  |                                          |
| 147 [247]. Malvaceae Juss.                                         | <b>Bombacaceae</b>                               | as APG IV                                |
|                                                                    | <b>Malvaceae</b>                                 | as APG IV                                |
|                                                                    | <b>Sterculiaceae</b>                             | as APG IV                                |
|                                                                    | <b>Tiliaceae</b>                                 | as APG IV                                |
| 148 [249]. <b>Thymelaeaceae</b> Juss.                              | as APG IV                                        | as APG IV                                |
| 149 [250]. Bixaceae Kunth                                          | <b>Bixaceae</b>                                  | as APG IV                                |
|                                                                    | <b>Cochlospermaceae</b>                          | as APG IV                                |
| 150 [253]. <b>Dipterocarpaceae</b> Blume                           | as APG IV                                        | as APG IV                                |
| <b>Brassicales</b> Bromhead                                        |                                                  |                                          |
| 151 [254]. Akaniaceae Stapf.                                       | <b>Bretschneideraceae</b>                        | as IFV                                   |
| 152 [255]. <b>Tropaeolaceae</b> Juss. ex DC.                       | as APG IV                                        | as APG IV                                |
| 153 [256]. <b>Moringaceae</b> Martinov                             | as APG IV                                        | as APG IV                                |
| 154 [257]. <b>Caricaceae</b> Dumort.                               | as APG IV                                        | as APG IV                                |
| 155 [262]. <b>Salvadoraceae</b> Lindl                              | as APG IV                                        | as APG IV                                |
| 156 [267]. Resedaceae Martinov                                     | Capparaceae: <i>Neothorelia, Stixis, Tirania</i> | Capparaceae: <i>Stixis, Tirania</i>      |

|                                                      |                                                                                              |                                                  |
|------------------------------------------------------|----------------------------------------------------------------------------------------------|--------------------------------------------------|
| 157 [268]. Capparaceae Juss.                         | <b>Capparaceae:</b> excl. <i>Cleome</i>                                                      | as IFV                                           |
| 158 [269]. Cleomaceae Bercht. & J. Presl             | <b>Capparaceae:</b> <i>Cleome</i>                                                            | as IFV                                           |
| 159 [270]. <b>Brassicaceae</b> Burnett               | as APG IV                                                                                    | as APG IV                                        |
| <b>SUPERASTERIDS</b>                                 |                                                                                              |                                                  |
| <b>Santalales</b> R. Br. ex Bercht. & J. Presl       |                                                                                              |                                                  |
| 160 [273]. 'Olacaceae' R. Br.                        | <b>Olacaceae</b><br>not recognized                                                           | as IFV<br>Erythraliaceae                         |
| 161 [274]. <b>Opiliaceae</b> Veleton                 | as APG IV                                                                                    | as APG IV                                        |
| 162 [275]. <b>Balanophoraceae</b> Rich.              | as APG IV                                                                                    | as APG IV                                        |
| 163 [276]. 'Santalaceae' R. Br.                      | <b>Santalaceae</b><br>Loranthaceae: <i>Ginalloa</i> ,<br><i>Korthalsella</i> , <i>Viscum</i> | as IFV<br>Viscaceae                              |
| 164 [278]. Schoepfiaceae Blume                       | Olacaceae: <i>Schoepfia</i>                                                                  | as APG IV                                        |
| 165 [279]. Loranthaceae Juss.                        | <b>Loranthaceae</b><br>Saxifragaceae: <i>Pilostigma</i>                                      | as IFV                                           |
| <b>Caryophyllales</b> Juss. ex Bercht. & J. Presl    |                                                                                              |                                                  |
| 166 [281]. <b>Tamaricaceae</b> Link                  | as APG IV                                                                                    | as APG IV                                        |
| 167 [282]. <b>Plumbaginaceae</b> Juss.               | as APG IV                                                                                    | as APG IV                                        |
| 168 [283]. <b>Polygonaceae</b> Juss.                 | as APG IV                                                                                    | as APG IV                                        |
| 169 [284]. <b>Droseraceae</b> Salisb.                | as APG IV                                                                                    | as APG IV                                        |
| 170 [285]. <b>Nepenthaceae</b> Dumort.               | as APG IV                                                                                    | as APG IV                                        |
| 171 [288]. <b>Ancistrocladaceae</b> Planch. ex Walp. | as APG IV                                                                                    | as APG IV                                        |
| 172 [295]. <b>Caryophyllaceae</b> Juss.              | as APG IV                                                                                    | as APG IV                                        |
| 173 [297]. Amaranthaceae Juss.                       | <b>Amaranthaceae</b><br><b>Chenopodiaceae</b>                                                | as IFV<br>as IFV                                 |
| 174 [303]. Gisekiaceae Nakai                         | Aizoaceae: <i>Gisekia</i>                                                                    | Molluginaceae: <i>Gisekia</i>                    |
| 175 [304]. Aizoaceae Martinov                        | <b>Aizoaceae</b><br>not recognized                                                           | as IFV<br>Tetragoniaceae                         |
| 176 [305]. <b>Phytolaccaceae</b> R. Br.              | as APG IV                                                                                    | as APG IV                                        |
| 177 [308]. <b>Nyctaginaceae</b> Juss.                | as APG IV                                                                                    | as APG IV                                        |
| 178 [309]. Molluginaceae Bartl.                      | <b>Molluginaceae:</b> <i>Glinus</i> ,<br><i>Mollugo</i>                                      | as IFV                                           |
| 179 [312]. <b>Basellaceae</b> Raf.                   | as APG IV                                                                                    | as APG IV                                        |
| 180 [314]. Talinaceae Doweld                         | <b>Portulacaceae:</b> <i>Talinum</i>                                                         | as IFV                                           |
| 181 [315]. <b>Portulacaceae</b> Juss.                | as APG IV                                                                                    | as APG IV                                        |
| 182 [317]. <b>Cactaceae</b> Juss.                    | as APG IV                                                                                    | as APG IV                                        |
| <b>ASTERIDS</b>                                      |                                                                                              |                                                  |
| <b>Cornales</b> Link                                 |                                                                                              |                                                  |
| 183 [318]. Nyssaceae Juss. ex Dumort.                | <b>Nyssaceae</b><br>Cornaceae: <i>Mastixia</i><br>not recognized                             | as IFV<br>Mastixiaceae<br>Davidiaceae            |
| 184 [320]. <b>Hydrangeaceae</b> Dumort.              | Hydrangeaceae: <i>Dichroa</i> , <i>Hydrangea</i> , <i>Plio-stegia</i> , <i>Schizophragma</i> | Saxifragaceae: <i>Dichroa</i> , <i>Hydrangea</i> |
| 185 [324]. Cornaceae Bercht. & J. Presl              | <b>Alangiaceae</b><br>Cornaceae: <i>Cornus</i>                                               | as IFV<br>Cornaceae                              |
| <b>Ericales</b> Bercht. & J. Presl                   |                                                                                              |                                                  |
| 186 [325]. <b>Balsaminaceae</b> A. Rich.             | as APG IV                                                                                    | as APG IV                                        |
| 187 [329]. <b>Polemoniaceae</b> Juss.                | as APG IV                                                                                    | as APG IV                                        |

|                                                                    |                                                                                           |                                                                      |
|--------------------------------------------------------------------|-------------------------------------------------------------------------------------------|----------------------------------------------------------------------|
| 188 [330]. <b>Lecythidaceae</b> A. Rich.                           | as APG IV                                                                                 | as APG IV                                                            |
|                                                                    | <b>Pentaphylacaceae</b>                                                                   | as IFV                                                               |
| 189 [332]. Pentaphylacaceae Engl.                                  | Theaceae: <i>Adinandra</i> ,<br><i>Anneslea</i> , <i>Eurya</i> ,<br><i>Ternstroemia</i>   | Theaceae: <i>Adinandra</i> , <i>Anneslea</i> , <i>Eurya</i>          |
| 190 [333]. <b>Sapotaceae</b> Juss.                                 | as APG IV                                                                                 | as APG IV                                                            |
| 191 [334]. <b>Ebenaceae</b> Gurke                                  | as APG IV                                                                                 | as APG IV                                                            |
| 192 [335]. Primulaceae Batsch ex Borkh.                            | <b>Myrsinaceae</b><br><b>Primulaceae</b>                                                  | as IFV<br>as IFV                                                     |
| 193 [336]. Theaceae Mirb.                                          | Theaceae: excl. <i>Adinandra</i> , <i>Anneslea</i> , <i>Eurya</i> ,<br><i>Temstroemia</i> | Theaceae: excl. <i>Adinandra</i> , <i>Anneslea</i> ,<br><i>Eurya</i> |
| 194 [337]. <b>Symplocaceae</b> Desf.                               | as APG IV                                                                                 | as APG IV                                                            |
| 195 [338]. Diapensiaceae Lindl.                                    | not recognized                                                                            | as APG IV                                                            |
| 196 [339]. <b>Styracaceae</b> DC. & Spreng.                        | as APG IV                                                                                 | as APG IV                                                            |
| 197 [342]. <b>Actinidiaceae</b> Gilg & Werderm.                    | as APG IV                                                                                 | as APG IV                                                            |
| 198 [343]. <b>Clethraceae</b> Klotzsch                             | as APG IV                                                                                 | as APG IV                                                            |
| 199 [345]. Ericaceae Juss.                                         | <b>Ericaceae</b><br><b>Epacridaceae</b><br>not recognized                                 | as IFV<br>as IFV<br>Pyrolaceae                                       |
| 200 [346]. Mitrastemonaceae Makino<br>[placement in order unclear] | <b>Rafflesiaceae</b> : <i>Mitrastemon</i>                                                 | as IFV                                                               |
| # <b>Icacinales</b> Tiegh.                                         |                                                                                           |                                                                      |
| 201 [348]. Icacinaceae Miers                                       | <b>Icacinaceae</b> : excl. <i>Gomphandra</i> , <i>Gonocaryum</i>                          | as IFV                                                               |
| <b>Garryales</b> Mart.                                             |                                                                                           |                                                                      |
| 202 [350]. <b>Eucommiaceae</b> Engl.                               | as APG IV                                                                                 | as APG IV                                                            |
| 203 [351]. Garryaceae Lindl.                                       | Cornaceae: <i>Aucuba</i>                                                                  | Aucubaceae                                                           |
| <b>Gentianales</b> Juss. ex Bercht. & J. Presl                     |                                                                                           |                                                                      |
| 204 [352]. Rubiaceae Juss.                                         | <b>Rubiaceae</b> : excl. <i>Carlemannia</i>                                               | as IFV                                                               |
| 205 [353]. Gentianaceae Juss.                                      | <b>Gentianaceae</b><br><b>Potaliaceae</b>                                                 | as IFV<br>as IFV                                                     |
| 206 [354]. Loganiaceae R. Br. ex Mart.                             | <b>Loganiaceae</b> : <i>Mitrasteme</i> , <i>Mitreola</i> , <i>Strychnos</i>               | as IFV                                                               |
| 207 [356]. Apocynaceae Juss.                                       | <b>Apocynaceae</b><br><b>Asclepiadaceae</b>                                               | as IFV<br>as IFV                                                     |
| <b>Boraginales</b> Juss. ex Bercht. & J. Presl                     |                                                                                           |                                                                      |
| 208 [357]. <b>Boraginaceae</b> Juss.                               | as APG IV                                                                                 | as APG IV                                                            |
| <b>Solanales</b> Juss. ex Bercht. & J. Presl                       |                                                                                           |                                                                      |
| 209 [359]. Convolvulaceae Juss.                                    | <b>Convolvulaceae</b><br>not recognized                                                   | as IFV<br>Cuscutaceae                                                |
| 210 [360]. <b>Solanaceae</b> Juss.                                 | as APG IV                                                                                 | as APG IV                                                            |
| 211 [362]. <b>Sphenocleaceae</b> T. Baskerv.                       | as APG IV                                                                                 | as APG IV                                                            |
| 212 [363]. <b>Hydroleaceae</b> R. Br.                              | as APG IV                                                                                 | as APG IV                                                            |
| <b>Lamiales</b> Romhead                                            |                                                                                           |                                                                      |
| 213 [365]. Carlemanniaceae Airy Shaw                               | <b>Rubiaceae</b> : <i>Carlemannia</i><br><b>Caprifoliaceae</b> : <i>Silvianthus</i>       | as IFV<br>as IFV                                                     |

|                                              |                                                                                                                                                                                                    |                                                                                                                                  |
|----------------------------------------------|----------------------------------------------------------------------------------------------------------------------------------------------------------------------------------------------------|----------------------------------------------------------------------------------------------------------------------------------|
| 214 [366]. <b>Oleaceae</b> Hoffmanns. & Link | as APG IV                                                                                                                                                                                          | as APG IV                                                                                                                        |
| 215 [369]. <b>Gesneriaceae</b> Rich. & Juss. | as APG IV                                                                                                                                                                                          | as APG IV                                                                                                                        |
|                                              | <b>Plantaginaceae</b>                                                                                                                                                                              | as IFV                                                                                                                           |
| 216 [370]. Plantaginaceae Juss.              | Scrophulariaceae: <i>Angelonia</i>                                                                                                                                                                 | Scrophulariaceae: <i>Adenosma, Angelonia, Antirrhinum, Bacopa, Digitalis, Limnophila, Russelia, Scoparia, Stemodia, Veronica</i> |
|                                              | <b>Callitrichaceae</b>                                                                                                                                                                             | as IFV                                                                                                                           |
|                                              | <b>Buddlejaceae</b>                                                                                                                                                                                | as IFV                                                                                                                           |
| 217 [371]. Scrophulariaceae Juss.            | <b>Myoporaceae</b>                                                                                                                                                                                 | as IFV                                                                                                                           |
|                                              | <b>Scrophulariaceae:</b><br><i>Scrophularia</i>                                                                                                                                                    | as IFV                                                                                                                           |
| 218 [373]. Linderniaceae Borsch et al.       | <b>Scrophulariaceae:</b><br><i>Legazpia, Linderna, Picria, Pierranthus, Torenia</i>                                                                                                                | as IFV                                                                                                                           |
| 219 [375]. <b>Martyniaceae</b> Horan.        | as APG IV                                                                                                                                                                                          | as APG IV                                                                                                                        |
| 220 [376]. <b>Pedaliaceae</b> R. Br.         | as APG IV                                                                                                                                                                                          | as APG IV                                                                                                                        |
|                                              | <b>Acanthaceae</b>                                                                                                                                                                                 | as IFV                                                                                                                           |
| 221 [377]. Acanthaceae Juss.                 | <b>Verbenaceae:</b> <i>Avicennia</i>                                                                                                                                                               | as IFV                                                                                                                           |
| 222 [378]. <b>Bignoniaceae</b> Juss.         | as APG IV                                                                                                                                                                                          | as APG IV                                                                                                                        |
| 223 [379]. <b>Lentibulariaceae</b> Rich.     | as APG IV                                                                                                                                                                                          | as APG IV                                                                                                                        |
| 224 [382]. Verbenaceae J. St. Hil.           | <b>Verbenaceae:</b> <i>Duranta, Lantana, Phyla, Stachtopheta, Verbena</i>                                                                                                                          | as IFV                                                                                                                           |
|                                              | <b>Lamiaceae</b>                                                                                                                                                                                   | as IFV                                                                                                                           |
| 225 [383]. Lamiaceae Martinov                | <b>Verbenaceae:</b> <i>Callicarpa, Caryopteris, Clerodendron, Congea, Garrettia, Gmelina, Hymenopyramis, Karomia, Prema, Schnabelia, Sphenodesme, Tectona, Teijsmanniodendron, Tsoongia, Vitex</i> | as IFV                                                                                                                           |
| 226 [384]. Mazaceae Reveal                   | <b>Scrophulariaceae:</b> <i>Mazus</i>                                                                                                                                                              | as IFV                                                                                                                           |
| 227 [385]. Phrymaceae Schauer                | <b>Scrophulariaceae:</b> <i>Mimulus, Mazus, Microcarpaea</i>                                                                                                                                       | as IFV                                                                                                                           |
| 228 [386]. Paulowniaceae Nakai               | <b>Scrophulariaceae:</b> <i>Paulownia</i>                                                                                                                                                          | as IFV                                                                                                                           |
|                                              | <b>Orobanchaceae</b>                                                                                                                                                                               | as IFV                                                                                                                           |
| 229 [387]. Orobanchaceae Vent.               | <b>Scrophulariaceae:</b> <i>Alectra, Brandisia, Centranthera, Lindendergia, Pedicularis, Rehmannia, Sopupia, Wightia</i>                                                                           | as IFV                                                                                                                           |
| <b>Aquifoliales</b> Senft                    |                                                                                                                                                                                                    |                                                                                                                                  |

|                                                    |                                                                               |                                                                     |
|----------------------------------------------------|-------------------------------------------------------------------------------|---------------------------------------------------------------------|
| 230 [388]. Stemonuraceae Karethed                  | <b>Icacinaceae:</b> <i>Gomphandra</i>                                         | as IFV                                                              |
| 231 [389]. Cardiopteridaceae Blume                 | <b>Cardiopteridaceae</b><br><b>Icacinaceae:</b> <i>Gonocaryum</i>             | as IFV<br>as IFV                                                    |
| 232 [391]. Helwingiaceae Decne.                    | Cornaceae: <i>Helwingia</i>                                                   | as APG IV                                                           |
| 233 [392]. <b>Aquifoliaceae</b> Bercht. & J. Presl | as APG IV                                                                     | as APG IV                                                           |
| <b>Asterales</b> Link                              |                                                                               |                                                                     |
| 234 [394]. Campanulaceae Juss.                     | <b>Campanulaceae:</b> excl. <i>Pentaphragma</i><br><b>Lobeliaceae</b>         | as IFV<br>as IFV                                                    |
| 235 [395]. Pentaphragmataceae J. Agardh            | <b>Campanulaceae:</b> <i>Pentaphragma</i>                                     | as IFV                                                              |
| 236 [396]. <b>Stylidiaceae</b> R. Br.              | as APG IV                                                                     | as APG IV                                                           |
| 237 [400]. <b>Menyanthaceae</b> Dumort.            | as APG IV                                                                     | as APG IV                                                           |
| 238 [401]. <b>Goodeniaceae</b> R. Br. ex Rich.     | as APG IV                                                                     | as APG IV                                                           |
| 239 [403]. <b>Asteraceae</b> Bercht. & J. Presl    | as APG IV                                                                     | as APG IV                                                           |
| <b>Escalloniales</b> Link                          |                                                                               |                                                                     |
| 240 [404]. Escallonoideaceae R. Br. ex Dumort.     | Saxifragaceae: <i>Polyosma</i>                                                | Escallonoideaceae: <i>Polyosma</i>                                  |
| <b>Dipsacales</b> Juss. ex Bercht. & J. Presl      |                                                                               |                                                                     |
| 241 [408]. Adoxaceae E. Mey.                       | <b>Caprifoliaceae:</b> <i>Sambucus</i> , <i>Viburnum</i>                      | as IFV                                                              |
| 242 [409]. Caprifoliaceae Juss.                    | Caprifoliaceae: <i>Lonicera</i><br><b>Dipsacaceae</b><br><b>Valerianaceae</b> | Caprifoliaceae: <i>Abelia</i> , <i>Lonicera</i><br>as IFV<br>as IFV |
| <b>Apiales</b> Nakai                               |                                                                               |                                                                     |
| 243 [411]. Torricelliaceae Hu                      | Cornaceae: <i>Torricellia</i>                                                 | as APG IV                                                           |
| 244 [413]. Pittosporaceae R. Br.                   | Pittosporaceae: excl. <i>Penthorum</i>                                        | as APG IV                                                           |
| 245 [414]. Araliaceae Juss.                        | <b>Araliaceae</b><br><b>Apiaceae:</b> <i>Hydrocotyle</i>                      | as IFV<br>as IFV                                                    |
| 246 [416]. Apiaceae Lindl.                         | <b>Apiaceae:</b> excl. <i>Hydrocotyle</i>                                     | as IFV                                                              |

**Note:** Numbers in square brackets are those of the linear Angiosperm Phylogeny Group of APG IV (2016).
